# Supplementary material for: A heterogeneous nickel-supported catalyst: a circular approach to amine synthesis via azide and nitro compound reduction
Source: Royal Society of Chemistry journal article supplement (doi:10.1039/d5su00323g), 2025-01-01
Supplement: d5su00323g1.pdf [file d5su00323g1.pdf]

## SUPPLEMENTARY INFORMATION

### **Heterogeneous Nickel-supported catalyst: a circular approach to amines synthesis via azides and nitro compounds reduction**

Filippo Campana,<sup>a</sup> Filippo Bocerani,<sup>a</sup> Federica Valentini,<sup>a</sup> Davide Gandolfo,<sup>a</sup> Dario Marchionni,<sup>a</sup> Dmitri Gelman<sup>b</sup> and Luigi Vaccaro<sup>\*a</sup>

<sup>a</sup>Laboratory of Green S.O.C. – Dipartimento di Chimica, Biologia e Biotecnologie, Università degli Studi di Perugia, Via Elce di Sotto 8, 06123 – Perugia – I; E-mail: [luigi.vaccaro@unipg.it](mailto:luigi.vaccaro@unipg.it);  
web: [www.dcbb.unipg.it/greensoc](http://www.dcbb.unipg.it/greensoc)

<sup>b</sup>Institute of Chemistry, The Hebrew University, 91904 Jerusalem, Israel.

#### Table of contents

|                                                                                           |       |
|-------------------------------------------------------------------------------------------|-------|
| 1. General remarks                                                                        | ESI 2 |
| 2. General procedures                                                                     | ESI 3 |
| 3. Catalyst activity and E-factors calculations                                           | ESI 5 |
| 4. Characterization data and <sup>1</sup> H, <sup>13</sup> C, <sup>19</sup> F NMR spectra | ESI 8 |

## 1. General remarks

All chemicals were purchased and used without additional purification unless specified otherwise. Gas-liquid chromatography (GLC) analyses were performed using an Agilent 6850 equipped with a capillary column DB-5MS (30 m, 0.22 mm, 0.25  $\mu$ m), a Flame Ionization Detector (FID) and Helium as the gas carrier. Gas chromatography with electron impact mass spectrometry (GC-EIMS) analyses were carried out using a Hewlett-Packard HP 6890N Network GC system/5975 Mass Selective Detector equipped with an electron impact ionizer at 70 eV.

Thin layer chromatography analyses were performed with silica gel on aluminium plates (silica gel 60 F254, Fluka). Column chromatography purification was performed with silica gel (230–400 mesh) neutralized with triethylamine, eluting with petroleum ether (PE)/ethyl acetate (EtOAc).

$^1\text{H}$ -NMR,  $^{13}\text{C}$ -NMR and  $^{19}\text{F}$ -NMR spectra were recorded at 400, 100.6 and 376 MHz respectively, on a Bruker DRX ADVANCE 400 MHz, using a  $\text{CDCl}_3$  (99.8 atom% D) or  $\text{DMSO}-d_6$  as the deuterated solvent. Chemical shifts are reported in ppm ( $\delta$ ), coupling constants (J) in Hertz and multiplicity are reported as follows: s = singlet, bs = broad singlet, d = doublet, t = triplet, m = multiplet. Metal loading and leaching were measured using MP-AES 4210 instrument.

Powder X-ray diffraction (PXRD) patterns are obtained by Cu-K $\alpha$  radiation ( $\lambda$  = 1.5406 Å) collected on Rigaku SmartLab-SE X. Angle range: 5–80°, rate: 10°/min. Transmission electron microscopy (TEM) analyses were performed on a JEM-F2100 operating at 200 kV. Field-emission scanning electron microscope was performed on an FEI Sirion 200 operating at 20 kV with spot size 5.0, WD 6mm.

Compounds **1a–h** were prepared by following known procedures.<sup>1–3</sup>

Compounds **1i** and **1j** were prepared as described in literature.<sup>4–5</sup>

## **2. General procedures**

### **2.1 General procedure for the PiNe support preparation**

The PiNe support was prepared following a previously reported procedure.<sup>6-7</sup>

### **2.2 General procedure for the Ni(B)/PiNe preparation**

In a 50 mL two-neck round-bottom flask, 400 mg of the PiNe support was suspended in 20 mL of ethanol and sonicated for 1 hour. Subsequently, a suspension of 79.8 mg of  $\text{NiCl}_2 \cdot 6\text{H}_2\text{O}$  was added under sonication, and the resulting mixture was further sonicated for another hour. Next, 118 mg of  $\text{NaBH}_4$  was suspended in 5 mL of ethanol, added at 0°C to the support, and left under stirring. After 1.5 hours, the catalyst was filtered, washed sequentially with ethanol, water, and acetone, and then dried under vacuum at 80°C for 1 hour. The Ni (5.1 wt%; 0.87 mmol/g) and B (0.43 wt%; 0.4 mmol/g) loadings, measured by MP-AES analysis, confirmed the presence of  $\text{Ni}_2\text{B}$  nanoparticles

### **2.3 General procedure for the azido and nitro compounds reduction**

In a 4 mL screw capped vial equipped with a magnetic stirrer, azido (**1**) or nitro compound (**3**) (0.25 mmol),  $\text{H}_2\text{O}$  (0.5 M, 0.5 mL), Ni(B)/PiNe (4 mol% calculated on Ni loading, 11.5 mg) and  $\text{NaBH}_4$  (2.5 eq., 23.65 mg) were consecutively added, and the resulting mixture was left under stirring at 40°C. After 2 h, the reaction mixture was left to cool to room temperature, diluted with 2-MeTHF (2 x 1 mL) and centrifuged (6500 rpm, 10', 5°C) to recover the reaction crude. Ni(B)/PiNe was subsequently washed with additional  $\text{H}_2\text{O}$  (0.5 mL; 6500 rpm, 10', 5°C) and dried at 110°C under vacuum overnight. The combined organic layer, once separated from the aqueous phase, was distilled and recovered (89%) to afford the desired product. If necessary, the concentrated crude was purified by column chromatography (using PE/EtOAc as the eluent) to obtain the final product (**2**).

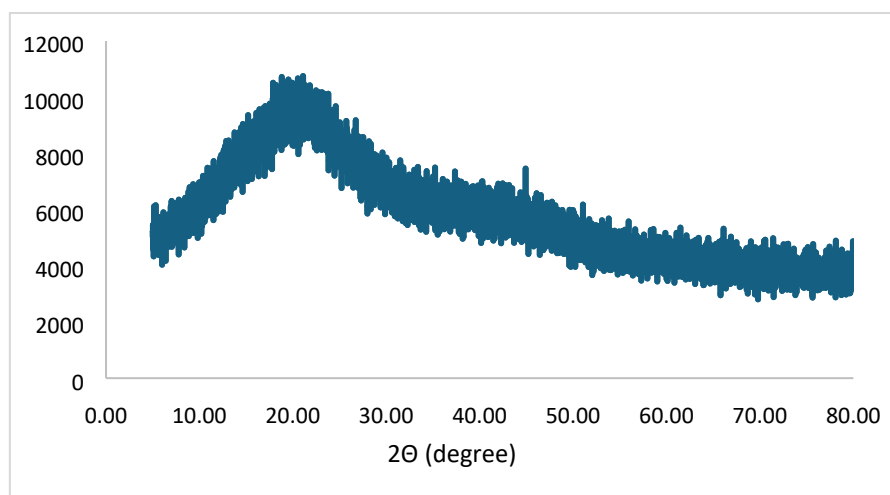

**Figure SI-1** PXRD of Ni(B)/PiNe

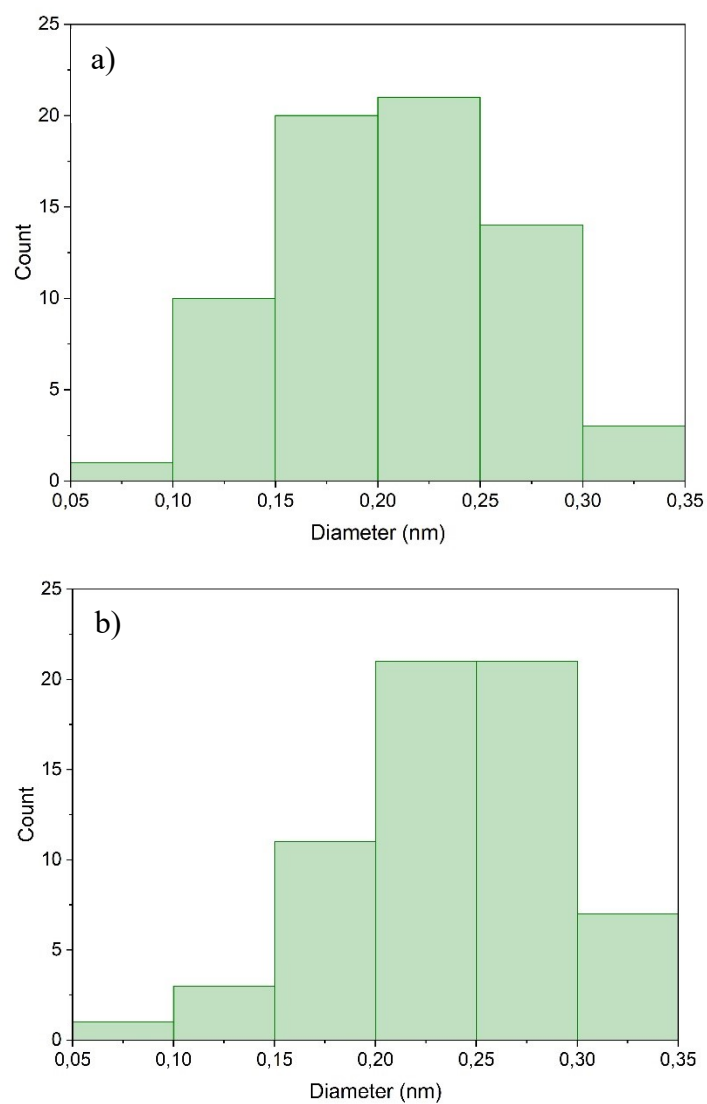

**Figure SI-2** Size distribution of metal nanoparticles. a) fresh catalyst; b) catalyst after 5 runs

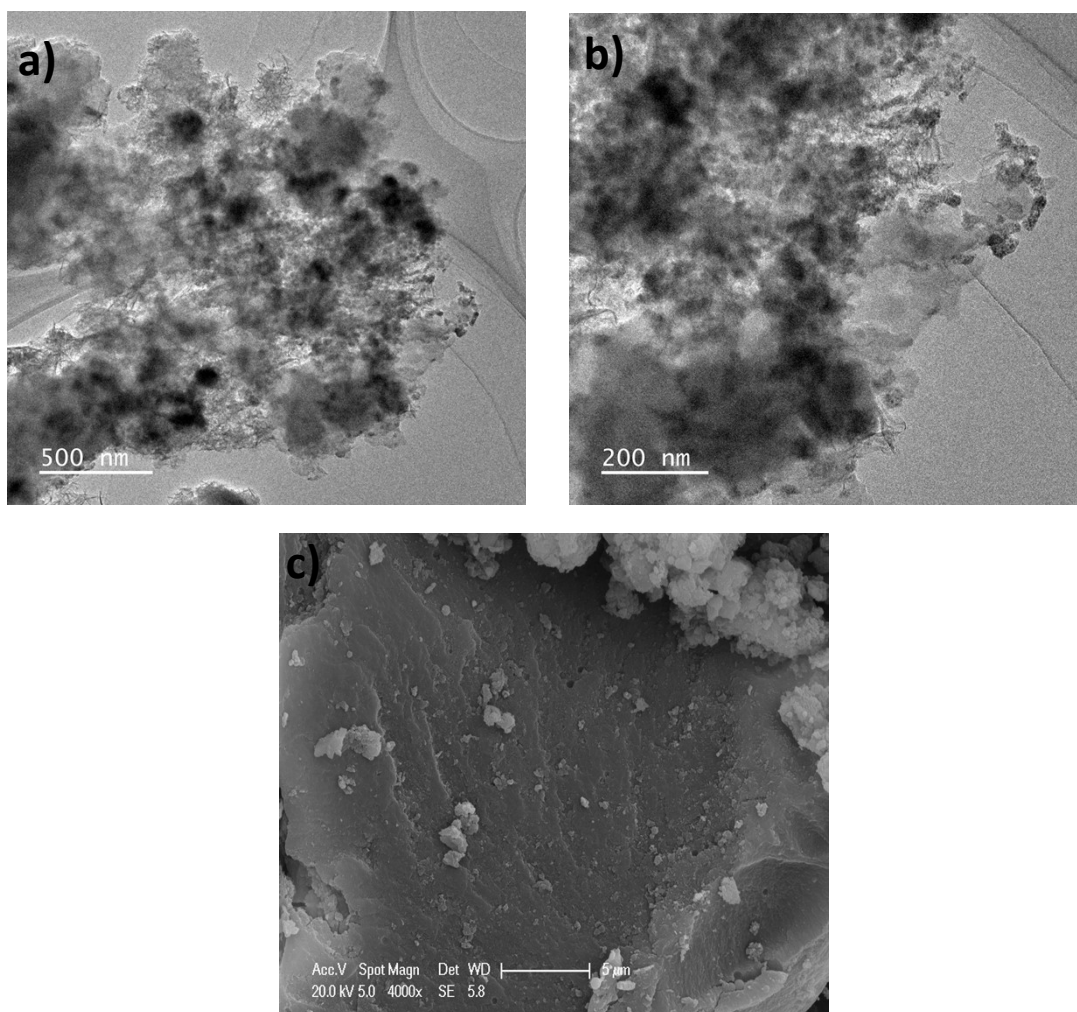

**Figure SI-3** Images of recovered Ni(B)/PiNe. a) TEM image of recycled Ni(B)/PiNe (500 nm); b) TEM images of recycled Ni(B)/PiNe (200 nm); c) SEM of recycled Ni(B)/PiNe (5  $\mu$ m)

### 3. Catalyst activity and E-factors calculations

**Table SI-1** TON and TOF calculations

| Ref.                                                    | TON | TON   | TOF ( $\text{h}^{-1}$ ) <sup>c</sup> | TOF ( $\text{h}^{-1}$ ) <sup>c</sup> |
|---------------------------------------------------------|-----|-------|--------------------------------------|--------------------------------------|
| <i>Synth.</i> , 2022, <b>54</b> , 133–146. <sup>a</sup> | 6.9 | 34.3  | 1.1                                  | 1.1                                  |
| <i>This work</i> <sup>b</sup>                           | 25  | 116.3 | 12.5                                 | 11.6                                 |

<sup>a</sup>Calculated considering the experimental procedures published and a catalyst loading of 7.15 mmol/g; <sup>b</sup>Calculated considering the experimental procedure herein developed and a catalyst loading of 0.87 mmol/g; <sup>c</sup> Calculated on five consecutive runs

**Table SI-2** Leaching experiments<sup>a</sup>

| Run | Leaching (ppm) |
|-----|----------------|
| 1   | 16.7           |
| 2   | 18.2           |
| 3   | 28.4           |
| 4   | 45             |

<sup>a</sup>Leaching values have been calculated up to the 4<sup>th</sup> run because of the sensitive conversion drop starting from the 5<sup>th</sup>.

**Table SI-3** E-factor calculations.<sup>a</sup>

| Ref.                                                    | E-Factor                                                                                                                                                                                                                                                                                               |
|---------------------------------------------------------|--------------------------------------------------------------------------------------------------------------------------------------------------------------------------------------------------------------------------------------------------------------------------------------------------------|
| <i>Synth.</i> , 2022, <b>54</b> , 133–146.              | 71.47 mg (azidobenzene) + 3164 (methanol) + 0.71 mg (NiCl <sub>2</sub> ·6H <sub>2</sub> O) + 56.75 (NaBH <sub>4</sub> ) + 3000 mg (H <sub>2</sub> O) + 8100 mg (ethyl acetate) – 45 mg (aniline) / 45 mg (aniline) = <b>318.84</b>                                                                     |
| <i>React. Chem. Eng.</i> , 2020, <b>5</b> , 58–65.      | 123.11 mg (nitrobenzene) + 10000 mg (H <sub>2</sub> O) + 20 mg (Ni/C) + 0.0121 (H <sub>2</sub> ) + 1170 (dichloromethane) + 5000 mg (H <sub>2</sub> O) + 3945 mg (ethanol) – 20 mg (Ni/C) – 93.13 mg (aniline) / 93.13 mg (aniline) = <b>332.27</b>                                                    |
| <i>This work</i><br>(calculated on <b>1a</b> reduction) | 29.78 mg (nitrobenzene) + 500 mg (H <sub>2</sub> O) + 11.5 mg (Ni(B)/PiNe) + 23.65 mg (NaBH <sub>4</sub> ) + 1708 mg (2-methyltetrahydrofuran) + 500 mg (H <sub>2</sub> O) – 11.5 mg (Ni(B)/PiNe) – 1520 mg (recovered 2-methyltetrahydrofuran) – 22.8 mg (aniline) / 22.8 mg (aniline) = <b>53.44</b> |
| <i>This work</i><br>(calculated on <b>3a</b> reduction) | 30.78 mg (nitrobenzene) + 500 mg (H <sub>2</sub> O) + 11.5 mg (Ni(B)/PiNe) + 23.65 mg (NaBH <sub>4</sub> ) + 1708 mg (2-methyltetrahydrofuran) + 500 mg (H <sub>2</sub> O) – 11.5 mg (Ni(B)/PiNe) – 1520 mg (recovered 2-methyltetrahydrofuran) – 22.8 mg (aniline) / 22.8 mg (aniline) = <b>53.49</b> |

<sup>a</sup>Given the data gaps in the reviewed literature's experimental procedures, the amount of solvent used for extractions and washing has been estimated based on our experimental expertise.

## References

1. L. Luciani, E. Goff, D. Lanari, S. Santoro and L. Vaccaro, *Green Chem.*, 2018, **20**, 183–187.
2. S. Dey and P. Ghosh, *ACS Omega*, 2023, **8**, 11039–11064.
3. S. K. Kang, J. Du Ha, H. G. Cheon, J. K. Choi, C. S. Hong and E. K. Yum, *Bull. Korean Chem. Soc.*, 2003, **24**, 1381–1384.
4. N. A. Dangroo, J. Singh, A. A. Dar, N. Gupta, P. K. Chinthakindi, A. Kaul, M. A. Khuroo and P. L. Sangwan, *Eur. J. Med. Chem.*, 2016, **120**, 160–169.

5. Z. S. Cheruvallath, S. L. Gwaltney, M. Sabat, M. Tang, J. Feng, H. Wang, J. Miura, P. Guntupalli, A. Jennings, D. Hosfield, B. Lee and Y. Wu, *Bioorganic Med. Chem. Lett.*, 2013, **23**, 2166–2171.
6. F. Campana, F. Valentini, A. Marrocchi, L. Vaccaro, D. Chimica, B. Biotecnologie, P. Via, D. Ingegneria and P. Via, 2023, **40**, 1989–1998.
7. F. Valentini, E. Cerza, F. Campana, A. Marrocchi and L. Vaccaro, *Bioresour. Technol.*, 2023, **390**, 129847.











|                                                                                                                                                                                                                                                                                                                                                                                                                                                                                                                                                                                                                                                                                                                                                                                                                                                                                                                                                                                                                                                                                                                                                                                                                                                                                                                                                                                                                                                                                                                                                                                                                                                                                                                                                                                                                                                                                                                                                                                                                                                                                                                                                                                                                                                                                                                                                                                                                                                                                                                                                                                                                                                                                                                                                                                                                                                                                                                                                                                                                                                                                                                                                                                                                                                                                                                                                                                                                                                                                                                                                                                                                                                                                                                                                                                                                                                                                                                                                                                                                                                                                                                                                                                                                                                                                                                                                                                                                                                                                                                                                                                                                                                                                                                                                                                                                                                                                                                                                                                                                                                                                                                                                                                                                                                                                                                                                                                                                                                                                                                                                                                                                                                                                                                                                                                                                                                                                                                                                                                                                                                                                                                                                                                                                                                                                                                                                                                                                                                                                                                                                                                                                                                                                                                                                                                                                                                                                                                                                                                                                                                                                                                                                                                                                                                                                                                                                                                                                                                                                                                                                                                                                                                                                                                                                                                                                                                                                                                                                                                                                                                                                                                                                                                                                                                                                                                                                                                                                                                                                                                                                                                                                                                                                                                                                                                                                                                                                                                                                                                                                                                                                                                                                                                                                                                                                                                                                                                                                                                                                                                                                                                                                                                                                                                                                                                                                                                                                                                                                                                                                                                                                                                                                                                                                                                                                                                                                                                                                                                                                                                                                                                                                                                                                                                                                                                                                                                                                                                                                                                                                                                                                                                                                                                                                                                                                                                                                                                                                                                                                                                                                                                                                                                                                                                                                                                                                                                                                                                                                                                                                                                                                                                                                                                                                                                                                                                                                                                                                                                                                                                                                                                                                                                                                                                                                                                                                                                                                                                                                                                                                                                                                                                                                                                                                                                                                                                                                                                                                                                                                                                                                                                                                                                                                                                                                                                                                                                                                                                                                                                                                                                                                                                                                                                                                                                                                                                                                                                                                                                                                                                                                                                                                                                                                                                                                                                                                                                                                                                                                                                                                                                                                                                                                                                                                                                                                                                                                                                                                                                                                                                                                                                                                                                                                                                                                                                                                                                                                                                                                                                                                                                                                                                                                                                                                                                                                                                                                                                                                                                                                                                                                                                                                                                                                                                                                                                                                                                                                                                                                                                                                                                                                                                                                                                                                                                                                                                                                                                                                                                                                                                                                                                                                                                                                                                                                                                                                                                                                                                                                                                                                                                                                                                                                                                                                                                                                                                                                                                                                                                                                                                                                                                                                                                                                                                                                                                                                                                                                                                                                                                                                                                                                                                                                                                                                                                                                                                                                                                                                                                                                                                                                                                                                                                                                                                                                                                                                                                                                                                                                                                                                                                                                                                                                                                                                                                                                                                                                                                                                                                                                                                                                                                                                                                                                                                                                                                                                                                                                                                                                                                                                                                                                                                                                                                                                                                                                                                                                                                                                                                                                                                                                                                                                                                                                                                                                                                                                                                                                                                                                                                                                                                                                                                                                                                                                                                                                                                                                                                                                                                                                                                                                                                                                                                                                                                                                                                                                                                                                                                                                                                                                                                                                                                                                                                                                                                                                                                                                                                                                                                                                                                                                                                                                                                                                                                                                                                                                                                                                                                                                                                                                                                                                                                                                                                                                                                                                                                                                                                                                                                                                                                                                                                                                                                                                                                                                                                                                                                                                                                                                                                                                                                                                                                                                                                                                                                                                                                                                                                                                                                                                                                                                                                                                                                                                                                                                                                                                                                                                                                                                                                                                                                                                                                                                                                                                                                                                                                                                                                                                                                                                                                                                                                                                                                                                                                                                                                                                                                                                                                                                                                                                                                                                                                                                                                                                                                                                                                                                                                                                                                                                                                                                                                                                                                                                                                                                                                                                                                                                                                                                                                                                                                                                                                                                                                                                                                                                                                                                                                                                                                                                                                                                                                                                                                                                                                                                                                                                                                                                                                                                                                                                                                                                                                                                                                                                                                                                                                                                                                                                                                                                                                                                                                                                                                                                                                                                                                                                                                                                                                                                                                                                                                                                                                                                                                                                                                                                                                                                                                                                                                                                                                                                                                                                                                                                                                                                                                                                                                                                                                                                                                                                                                                                                                                                                                                                                                                                                                                                                                                                                                                                                                                                                                                                                                                                                                                                                                                                                                                                                                                                                                                                                                                                                                                                                                                                                                                                                                                                                                                                                                                                                                                                                                                                                                                                                                                                                                                                                                                                                                                                                                                                                                                                                                                                                                                                                                                                                                                                                                                                                                                                                                                                                                                                                                                                                                                                                                                                                                                                                                                                                                                                                                                                                                                                                                                                                                                                                                                                                                                                                                                                                                                                                                                                                                                                                                                                                                                                                                                                                                                                                                                                                                                                                                                                                                                                                                                                                                                                                                                                                                                                                                                                                                                                                                                                                                                                                                                                                                                                                                                                                                                                                                                                                                                                                                                                                                                                                                                                                                                                                                                                                                                                                                                                                                                                                                                                                                                                                                                                                                                                                                                                                                                                                                                                                                                                                                                                                                                                                                                                                                                                                                                                                                                                                                                                                                                                                                                                                                                                                                                                                                                                                                                                                                                                                                   |                              |  |  |  |  |
|-----------------------------------------------------------------------------------------------------------------------------------------------------------------------------------------------------------------------------------------------------------------------------------------------------------------------------------------------------------------------------------------------------------------------------------------------------------------------------------------------------------------------------------------------------------------------------------------------------------------------------------------------------------------------------------------------------------------------------------------------------------------------------------------------------------------------------------------------------------------------------------------------------------------------------------------------------------------------------------------------------------------------------------------------------------------------------------------------------------------------------------------------------------------------------------------------------------------------------------------------------------------------------------------------------------------------------------------------------------------------------------------------------------------------------------------------------------------------------------------------------------------------------------------------------------------------------------------------------------------------------------------------------------------------------------------------------------------------------------------------------------------------------------------------------------------------------------------------------------------------------------------------------------------------------------------------------------------------------------------------------------------------------------------------------------------------------------------------------------------------------------------------------------------------------------------------------------------------------------------------------------------------------------------------------------------------------------------------------------------------------------------------------------------------------------------------------------------------------------------------------------------------------------------------------------------------------------------------------------------------------------------------------------------------------------------------------------------------------------------------------------------------------------------------------------------------------------------------------------------------------------------------------------------------------------------------------------------------------------------------------------------------------------------------------------------------------------------------------------------------------------------------------------------------------------------------------------------------------------------------------------------------------------------------------------------------------------------------------------------------------------------------------------------------------------------------------------------------------------------------------------------------------------------------------------------------------------------------------------------------------------------------------------------------------------------------------------------------------------------------------------------------------------------------------------------------------------------------------------------------------------------------------------------------------------------------------------------------------------------------------------------------------------------------------------------------------------------------------------------------------------------------------------------------------------------------------------------------------------------------------------------------------------------------------------------------------------------------------------------------------------------------------------------------------------------------------------------------------------------------------------------------------------------------------------------------------------------------------------------------------------------------------------------------------------------------------------------------------------------------------------------------------------------------------------------------------------------------------------------------------------------------------------------------------------------------------------------------------------------------------------------------------------------------------------------------------------------------------------------------------------------------------------------------------------------------------------------------------------------------------------------------------------------------------------------------------------------------------------------------------------------------------------------------------------------------------------------------------------------------------------------------------------------------------------------------------------------------------------------------------------------------------------------------------------------------------------------------------------------------------------------------------------------------------------------------------------------------------------------------------------------------------------------------------------------------------------------------------------------------------------------------------------------------------------------------------------------------------------------------------------------------------------------------------------------------------------------------------------------------------------------------------------------------------------------------------------------------------------------------------------------------------------------------------------------------------------------------------------------------------------------------------------------------------------------------------------------------------------------------------------------------------------------------------------------------------------------------------------------------------------------------------------------------------------------------------------------------------------------------------------------------------------------------------------------------------------------------------------------------------------------------------------------------------------------------------------------------------------------------------------------------------------------------------------------------------------------------------------------------------------------------------------------------------------------------------------------------------------------------------------------------------------------------------------------------------------------------------------------------------------------------------------------------------------------------------------------------------------------------------------------------------------------------------------------------------------------------------------------------------------------------------------------------------------------------------------------------------------------------------------------------------------------------------------------------------------------------------------------------------------------------------------------------------------------------------------------------------------------------------------------------------------------------------------------------------------------------------------------------------------------------------------------------------------------------------------------------------------------------------------------------------------------------------------------------------------------------------------------------------------------------------------------------------------------------------------------------------------------------------------------------------------------------------------------------------------------------------------------------------------------------------------------------------------------------------------------------------------------------------------------------------------------------------------------------------------------------------------------------------------------------------------------------------------------------------------------------------------------------------------------------------------------------------------------------------------------------------------------------------------------------------------------------------------------------------------------------------------------------------------------------------------------------------------------------------------------------------------------------------------------------------------------------------------------------------------------------------------------------------------------------------------------------------------------------------------------------------------------------------------------------------------------------------------------------------------------------------------------------------------------------------------------------------------------------------------------------------------------------------------------------------------------------------------------------------------------------------------------------------------------------------------------------------------------------------------------------------------------------------------------------------------------------------------------------------------------------------------------------------------------------------------------------------------------------------------------------------------------------------------------------------------------------------------------------------------------------------------------------------------------------------------------------------------------------------------------------------------------------------------------------------------------------------------------------------------------------------------------------------------------------------------------------------------------------------------------------------------------------------------------------------------------------------------------------------------------------------------------------------------------------------------------------------------------------------------------------------------------------------------------------------------------------------------------------------------------------------------------------------------------------------------------------------------------------------------------------------------------------------------------------------------------------------------------------------------------------------------------------------------------------------------------------------------------------------------------------------------------------------------------------------------------------------------------------------------------------------------------------------------------------------------------------------------------------------------------------------------------------------------------------------------------------------------------------------------------------------------------------------------------------------------------------------------------------------------------------------------------------------------------------------------------------------------------------------------------------------------------------------------------------------------------------------------------------------------------------------------------------------------------------------------------------------------------------------------------------------------------------------------------------------------------------------------------------------------------------------------------------------------------------------------------------------------------------------------------------------------------------------------------------------------------------------------------------------------------------------------------------------------------------------------------------------------------------------------------------------------------------------------------------------------------------------------------------------------------------------------------------------------------------------------------------------------------------------------------------------------------------------------------------------------------------------------------------------------------------------------------------------------------------------------------------------------------------------------------------------------------------------------------------------------------------------------------------------------------------------------------------------------------------------------------------------------------------------------------------------------------------------------------------------------------------------------------------------------------------------------------------------------------------------------------------------------------------------------------------------------------------------------------------------------------------------------------------------------------------------------------------------------------------------------------------------------------------------------------------------------------------------------------------------------------------------------------------------------------------------------------------------------------------------------------------------------------------------------------------------------------------------------------------------------------------------------------------------------------------------------------------------------------------------------------------------------------------------------------------------------------------------------------------------------------------------------------------------------------------------------------------------------------------------------------------------------------------------------------------------------------------------------------------------------------------------------------------------------------------------------------------------------------------------------------------------------------------------------------------------------------------------------------------------------------------------------------------------------------------------------------------------------------------------------------------------------------------------------------------------------------------------------------------------------------------------------------------------------------------------------------------------------------------------------------------------------------------------------------------------------------------------------------------------------------------------------------------------------------------------------------------------------------------------------------------------------------------------------------------------------------------------------------------------------------------------------------------------------------------------------------------------------------------------------------------------------------------------------------------------------------------------------------------------------------------------------------------------------------------------------------------------------------------------------------------------------------------------------------------------------------------------------------------------------------------------------------------------------------------------------------------------------------------------------------------------------------------------------------------------------------------------------------------------------------------------------------------------------------------------------------------------------------------------------------------------------------------------------------------------------------------------------------------------------------------------------------------------------------------------------------------------------------------------------------------------------------------------------------------------------------------------------------------------------------------------------------------------------------------------------------------------------------------------------------------------------------------------------------------------------------------------------------------------------------------------------------------------------------------------------------------------------------------------------------------------------------------------------------------------------------------------------------------------------------------------------------------------------------------------------------------------------------------------------------------------------------------------------------------------------------------------------------------------------------------------------------------------------------------------------------------------------------------------------------------------------------------------------------------------------------------------------------------------------------------------------------------------------------------------------------------------------------------------------------------------------------------------------------------------------------------------------------------------------------------------------------------------------------------------------------------------------------------------------------------------------------------------------------------------------------------------------------------------------------------------------------------------------------------------------------------------------------------------------------------------------------------------------------------------------------------------------------------------------------------------------------------------------------------------------------------------------------------------------------------------------------------------------------------------------------------------------------------------------------------------------------------------------------------------------------------------------------------------------------------------------------------------------------------------------------------------------------------------------------------------------------------------------------------------------------------------------------------------------------------------------------------------------------------------------------------------------------------------------------------------------------------------------------------------------------------------------------------------------------------------------------------------------------------------------------------------------------------------------------------------------------------------------------------------------------------------------------------------------------------------------------------------------------------------------------------------------------------------------------------------------------------------------------------------------------------------------------------------------------------------------------------------------------------------------------------------------------------------------------------------------------------------------------------------------------------------------------------------------------------------------------------------------------------------------------------------------------------------------------------------------------------------------------------------------------------------------------------------------------------------------------------------------------------------------------------------------------------------------------------------------------------------------------------------------------------------------------------------------------------------------------------------------------------------------------------------------------------------------------------------------------------------------------------------------------------------------------------------------------------------------------------------------------------------------------------------------------------------------------------------------------------------------------------------------------------------------------------------------------------------------------------------------------------------------------------------------------------------------------------------------------------------------------------------------------------------------------------------------------------------------------------------------------------------------------------------------------------------------------------------------------------------------------------------------------------------------------------------------------------------------------------------------------------------------------------------------------------------------------------------------------------------------------------------------------------------------------------------------------------------------------------------------------------------------------------------------------------------------------------------------------------------------------------------------------------------------------------------------------------------------------------------------------------------------------------------------------------------------------------------------------------------------------------------------------------------------------------------------------------------------------------------------------------------------------------------------------------------------------------------------------------------------------------------------------------------------------------------------------------------------------------------------------------------------------------------------------------------------------------------------------------------------------------------------------------------------------------------------------------------------------------------------------------------------------------------------------------------------------------------------------------------------------------------------------------------------------------------------------------------------------------------------------------------------------------------------------------------------------------------------------------------------------------------------------------------------------------------------------------------------------------------------------------------------------------------------------------------------------------------------------------------------------------------------------------------------------------------------------------------------------------------------------------------------------------------------------------------------------------------------------------------------------------------------------------------------------------------------------------------------------------------------------------------------------------------------------------------------------------------------------------------------------------------------------------------------------------------------------------------------------------------------------------------------------------------------------------------------------------------------------------------------------------------------------------------------------------------------------------------------------------------------------------------------------------------------------------------------------------------------------------------------------------------------------------------------------------------------------------------------------------------------------------------------------------------------------------------------------------------------------------------------------------------------------------------------------------------------------------------------------------------------------------------------------------------------------------------------------------------------------------------------------------------------------------------------------------------------------------------------------------------------------------------------------------------------------------------------------------------------------------------------------------------------------------------------------------------------------------------------------------------------------------------------------------------------------------------------------------------------------------------------------------------------------------------------------------------------------------------------------------------------------------------------------------------------------------------------------------------------------------------------------------------------------------------------------------------------------------------------------------------------------------------------------------------------------------------------------------------------------------------------------------------------------------------------------------------------------------------------------------------------------------------------------------------------------------------------------------------------------------------------------------------------------------------------------------------------------------------------------------------------------------------------------------------------------------------------------------------------------------------------------------------------------------------------------------------------------------------------------------------------------------------------------------------------------------------------------------------------------------------------------------------------------------------------------------------------------------------------------------------------------------------------------------------------------------------------------------------------------------------------------------------------------------------------------------------------------------------------------------------------------------------------------------------------------------------------------------------------------------------------------------------------------------------------------------------------------------------------------------------------------------------------------------------------------------------------------------------------------------------------------------------------------------------------------------------------------------------------------------------------------------------------------------------------------------------------------------------------------------------------------------------------------------------------------------------------------------------------------------------------------------------------------------------------------------------------------------------------------------------------------------------------------------------------------------------------------------------------------------------------------------------------------------------------------------------------------------------------------------------------------------------------------------------------------------------------------------------------------------------------------------------------------------------------------------------------------------------------------------------------------------------------------------------------------------------------------------------------------------------------------------------------------------------------------------------------------------------------------------------------------------------------------------------------------------------------------------------------------------------------------------------------------------------------------------------------------------------------------------------------------------------------------------------------------------------------------------------------------------------------------------------------------------------------------------------------------------------------------------------------------------------------------------------------------------------------------------------------------------------------------------------------------------------------------------------------------------------------------------------------------------------------------------------------------------------------------------------------------------------------------------------------------------------------------------------------------------------------------------------------------------------------------------------------------------------------------------------------------------------------------------------------------------------------------------------------------------------------------------------------------------------------------------------------------------------------------------------------------------------------------------------------------------------------------------------------------------------------------------------------------------------------------------------------------------------------------------------------------------------------------------------------------------------------------------------------------------------------------------------------------------------------------------------------------------------------------------------------------------------------------------------------------------------------------------------------------------------------------------------------------------------------------------------------------------------------------------------------------------------------------------------------------------------------------------------------------------------------------------------------------------------------------------------------------------------------------------------------------------------------------------------------------------------------------------------------------------------------------------------------------------------------------------------------------------------------------------------------------------------------------------------------------------------------------------------------------------------------------------------------------------------------------------------------------------------------------------------------------------------------------------------------------------------------------------------------------------------------------------------------------------------------------------------------------------------------------------------------------------------------------------------------------------------------------------------------------------------------------------------------------------------------------------------------------------------------------------------------------------------------------------------------------------------------------------------------------------------------------------------------------------------------------------------------------------------------------------------------------------------------------------------------------------------------------------------------------------------------------------------------------------------------------------------------------------------------------------------------------------------------------------------------------------------------------------------------------------------------------------------------------------------------------------------------------------------------------------------------------------------------------------------------------------------------------------------------------------------------------------------------------------------------------------------------------------------------------------------------------------------------------------------------------------------------------------------------------------------------------------------------------------------------------------------------------------------------------------------------------------------------------------------------------------------------------------------------------------------------------------------------------------------------------------------------------------------------------------------------------------------------------------------------------------------------------------------------------------------------------------------------------------------------------------------------------------------------------------------------------------------------------------------------------------------------------------------------------------------------------------------------------------------------------------------------------------------------------------------------------------------------------------------------------------------------------------------------------------------------------------------------------------------------------------------------------------------------------------------------------------------------------------------------------------------------------------------------------------------------------------------------------------------------------------------------------------------------------------------------------------------------------------------------------------------------------------------------------------------------------------------------------------------------------------------------------------------------------------------------------------------------------------------------------------------------------------------------------------------------------------------------------------------------------------------------------------------------------------------------------------------------------------------------------------------------------------------------------------------------------------------------------------------------------------------------------------------------------------------------------------------------------------------------------------------------------------------------------------------------------------------------------------------------------------------------------------------------------------------------------------------------------------------------------------------------------------------------------------------------------------------------------------------------------------------------------------------------------------------------------------------------------------------------------------------------------------------------------------------------------------------------------------------------------------------------------------------------------------------------------------------------------------------------------------------------------------------------------------------------------------------------------------------------------------------------------------------------------------------------------------------------------------------------------------------------------------------------------------------------------------------------------------------------------------------------------------------------------------------------------------------------------------------------------------------------------------------------------------------------------------------------------------------------------------------------------------------------------------------------------------------------------------------------------------------------------------------------------------------------------------------------------------------------------------------------------------------------------------------------------------------------------------------------------------------------------------------------------------------------------------------------------------------------------------------------------------------------------------------------------------------------------------------------------------------------------------------------------------------------|------------------------------|--|--|--|--|
| Chem. Name                                                                                                                                                                                                                                                                                                                                                                                                                                                                                                                                                                                                                                                                                                                                                                                                                                                                                                                                                                                                                                                                                                                                                                                                                                                                                                                                                                                                                                                                                                                                                                                                                                                                                                                                                                                                                                                                                                                                                                                                                                                                                                                                                                                                                                                                                                                                                                                                                                                                                                                                                                                                                                                                                                                                                                                                                                                                                                                                                                                                                                                                                                                                                                                                                                                                                                                                                                                                                                                                                                                                                                                                                                                                                                                                                                                                                                                                                                                                                                                                                                                                                                                                                                                                                                                                                                                                                                                                                                                                                                                                                                                                                                                                                                                                                                                                                                                                                                                                                                                                                                                                                                                                                                                                                                                                                                                                                                                                                                                                                                                                                                                                                                                                                                                                                                                                                                                                                                                                                                                                                                                                                                                                                                                                                                                                                                                                                                                                                                                                                                                                                                                                                                                                                                                                                                                                                                                                                                                                                                                                                                                                                                                                                                                                                                                                                                                                                                                                                                                                                                                                                                                                                                                                                                                                                                                                                                                                                                                                                                                                                                                                                                                                                                                                                                                                                                                                                                                                                                                                                                                                                                                                                                                                                                                                                                                                                                                                                                                                                                                                                                                                                                                                                                                                                                                                                                                                                                                                                                                                                                                                                                                                                                                                                                                                                                                                                                                                                                                                                                                                                                                                                                                                                                                                                                                                                                                                                                                                                                                                                                                                                                                                                                                                                                                                                                                                                                                                                                                                                                                                                                                                                                                                                                                                                                                                                                                                                                                                                                                                                                                                                                                                                                                                                                                                                                                                                                                                                                                                                                                                                                                                                                                                                                                                                                                                                                                                                                                                                                                                                                                                                                                                                                                                                                                                                                                                                                                                                                                                                                                                                                                                                                                                                                                                                                                                                                                                                                                                                                                                                                                                                                                                                                                                                                                                                                                                                                                                                                                                                                                                                                                                                                                                                                                                                                                                                                                                                                                                                                                                                                                                                                                                                                                                                                                                                                                                                                                                                                                                                                                                                                                                                                                                                                                                                                                                                                                                                                                                                                                                                                                                                                                                                                                                                                                                                                                                                                                                                                                                                                                                                                                                                                                                                                                                                                                                                                                                                                                                                                                                                                                                                                                                                                                                                                                                                                                                                                                                                                                                                                                                                                                                                                                                                                                                                                                                                                                                                                                                                                                                                                                                                                                                                                                                                                                                                                                                                                                                                                                                                                                                                                                                                                                                                                                                                                                                                                                                                                                                                                                                                                                                                                                                                                                                                                                                                                                                                                                                                                                                                                                                                                                                                                                                                                                                                                                                                                                                                                                                                                                                                                                                                                                                                                                                                                                                                                                                                                                                                                                                                                                                                                                                                                                                                                                                                                                                                                                                                                                                                                                                                                                                                                                                                                                                                                                                                                                                                                                                                                                                                                                                                                                                                                                                                                                                                                                                                                                                                                                                                                                                                                                                                                                                                                                                                                                                                                                                                                                                                                                                                                                                                                                                                                                                                                                                                                                                                                                                                                                                                                                                                                                                                                                                                                                                                                                                                                                                                                                                                                                                                                                                                                                                                                                                                                                                                                                                                                                                                                                                                                                                                                                                                                                                                                                                                                                                                                                                                                                                                                                                                                                                                                                                                                                                                                                                                                                                                                                                                                                                                                                                                                                                                                                                                                                                                                                                                                                                                                                                                                                                                                                                                                                                                                                                                                                                                                                                                                                                                                                                                                                                                                                                                                                                                                                                                                                                                                                                                                                                                                                                                                                                                                                                                                                                                                                                                                                                                                                                                                                                                                                                                                                                                                                                                                                                                                                                                                                                                                                                                                                                                                                                                                                                                                                                                                                                                                                                                                                                                                                                                                                                                                                                                                                                                                                                                                                                                                                                                                                                                                                                                                                                                                                                                                                                                                                                                                                                                                                                                                                                                                                                                                                                                                                                                                                                                                                                                                                                                                                                                                                                                                                                                                                                                                                                                                                                                                                                                                                                                                                                                                                                                                                                                                                                                                                                                                                                                                                                                                                                                                                                                                                                                                                                                                                                                                                                                                                                                                                                                                                                                                                                                                                                                                                                                                                                                                                                                                                                                                                                                                                                                                                                                                                                                                                                                                                                                                                                                                                                                                                                                                                                                                                                                                                                                                                                                                                                                                                                                                                                                                                                                                                                                                                                                                                                                                                                                                                                                                                                                                                                                                                                                                                                                                                                                                                                                                                                                                                                                                                                                                                                                                                                                                                                                                                                                                                                                                                                                                                                                                                                                                                                                                                                                                                                                                                                                                                                                                                                                                                                                                                                                                                                                                                                                                                                                                                                                                                                                                                                                                                                                                                                                                                                                                                                                                                                                                                                                                                                                                                                                                                                                                                                                                                                                                                                                                                                                                                                                                                                                                                                                                                                                                                                                                                                                                                                                                                                                                                                                                                                                                                                                                                                                                                                                                                                                                                                                                                                                                                                                                                                                                                                                                                                                                                                                                                                                                                                                                                                                                                                                                                                                                                                                                                                                                                                                                                                                                                                                                                                                                                                                                                                                                                                                                                                                                                                                                                                                                                                                                                                                                                                                                                                                                                                                                                                                                        | 2-Chloroaniline (2e)         |  |  |  |  |
|                                                                                                                                                                                                                                                                                                                                                                                                                                                                                                                                                                                                                                                                                                                                                                                                                                                                                                                                                                                                                                                                                                                                                                                                                                                                                                                                                                                                                                                                                                                                                                                                                                                                                                                                                                                                                                                                                                                                                                                                                                                                                                                                                                                                                                                                                                                                                                                                                                                                                                                                                                                                                                                                                                                                                                                                                                                                                                                                                                                                                                                                                                                                                                                                                                                                                                                                                                                                                                                                                                                                                                                                                                                                                                                                                                                                                                                                                                                                                                                                                                                                                                                                                                                                                                                                                                                                                                                                                                                                                                                                                                                                                                                                                                                                                                                                                                                                                                                                                                                                                                                                                                                                                                                                                                                                                                                                                                                                                                                                                                                                                                                                                                                                                                                                                                                                                                                                                                                                                                                                                                                                                                                                                                                                                                                                                                                                                                                                                                                                                                                                                                                                                                                                                                                                                                                                                                                                                                                                                                                                                                                                                                                                                                                                                                                                                                                                                                                                                                                                                                                                                                                                                                                                                                                                                                                                                                                                                                                                                                                                                                                                                                                                                                                                                                                                                                                                                                                                                                                                                                                                                                                                                                                                                                                                                                                                                                                                                                                                                                                                                                                                                                                                                                                                                                                                                                                                                                                                                                                                                                                                                                                                                                                                                                                                                                                                                                                                                                                                                                                                                                                                                                                                                                                                                                                                                                                                                                                                                                                                                                                                                                                                                                                                                                                                                                                                                                                                                                                                                                                                                                                                                                                                                                                                                                                                                                                                                                                                                                                                                                                                                                                                                                                                                                                                                                                                                                                                                                                                                                                                                                                                                                                                                                                                                                                                                                                                                                                                                                                                                                                                                                                                                                                                                                                                                                                                                                                                                                                                                                                                                                                                                                                                                                                                                                                                                                                                                                                                                                                                                                                                                                                                                                                                                                                                                                                                                                                                                                                                                                                                                                                                                                                                                                                                                                                                                                                                                                                                                                                                                                                                                                                                                                                                                                                                                                                                                                                                                                                                                                                                                                                                                                                                                                                                                                                                                                                                                                                                                                                                                                                                                                                                                                                                                                                                                                                                                                                                                                                                                                                                                                                                                                                                                                                                                                                                                                                                                                                                                                                                                                                                                                                                                                                                                                                                                                                                                                                                                                                                                                                                                                                                                                                                                                                                                                                                                                                                                                                                                                                                                                                                                                                                                                                                                                                                                                                                                                                                                                                                                                                                                                                                                                                                                                                                                                                                                                                                                                                                                                                                                                                                                                                                                                                                                                                                                                                                                                                                                                                                                                                                                                                                                                                                                                                                                                                                                                                                                                                                                                                                                                                                                                                                                                                                                                                                                                                                                                                                                                                                                                                                                                                                                                                                                                                                                                                                                                                                                                                                                                                                                                                                                                                                                                                                                                                                                                                                                                                                                                                                                                                                                                                                                                                                                                                                                                                                                                                                                                                                                                                                                                                                                                                                                                                                                                                                                                                                                                                                                                                                                                                                                                                                                                                                                                                                                                                                                                                                                                                                                                                                                                                                                                                                                                                                                                                                                                                                                                                                                                                                                                                                                                                                                                                                                                                                                                                                                                                                                                                                                                                                                                                                                                                                                                                                                                                                                                                                                                                                                                                                                                                                                                                                                                                                                                                                                                                                                                                                                                                                                                                                                                                                                                                                                                                                                                                                                                                                                                                                                                                                                                                                                                                                                                                                                                                                                                                                                                                                                                                                                                                                                                                                                                                                                                                                                                                                                                                                                                                                                                                                                                                                                                                                                                                                                                                                                                                                                                                                                                                                                                                                                                                                                                                                                                                                                                                                                                                                                                                                                                                                                                                                                                                                                                                                                                                                                                                                                                                                                                                                                                                                                                                                                                                                                                                                                                                                                                                                                                                                                                                                                                                                                                                                                                                                                                                                                                                                                                                                                                                                                                                                                                                                                                                                                                                                                                                                                                                                                                                                                                                                                                                                                                                                                                                                                                                                                                                                                                                                                                                                                                                                                                                                                                                                                                                                                                                                                                                                                                                                                                                                                                                                                                                                                                                                                                                                                                                                                                                                                                                                                                                                                                                                                                                                                                                                                                                                                                                                                                                                                                                                                                                                                                                                                                                                                                                                                                                                                                                                                                                                                                                                                                                                                                                                                                                                                                                                                                                                                                                                                                                                                                                                                                                                                                                                                                                                                                                                                                                                                                                                                                                                                                                                                                                                                                                                                                                                                                                                                                                                                                                                                                                                                                                                                                                                                                                                                                                                                                                                                                                                                                                                                                                                                                                                                                                                                                                                                                                                                                                                                                                                                                                                                                                                                                                                                                                                                                                                                                                                                                                                                                                                                                                                                                                                                                                                                                                                                                                                                                                                                                                                                                                                                                                                                                                                                                                                                                                                                                                                                                                                                                                                                                                                                                                                                                                                                                                                                                                                                                                                                                                                                                                                                                                                                                                                                                                                                                                                                                                                                                                                                                                                                                                                                                                                                                                                                                                                                                                                                                                                                                                                                                                                                                                                                                                                                                                                                                                                                                                                                                                                                                                                                                                                                                                                                                                                                                                                                                                                                                                                                                                                                                                                                                                                                                                                                                                   | RSC Adv., 2013, 3, 1050-1054 |  |  |  |  |
| <div><div><div><div><div><div><span></span></div><div><span></span></div><div><span></span></div><div><span></span></div><div><span></span></div><div><span></span></div></div></div><div><div><div><span></span></div><div><span></span></div><div><span></span></div><div><span></span></div><div><span></span></div><div><span></span></div></div></div><div><div><div><span></span></div><div><span></span></div><div><span></span></div><div><span></span></div><div><span></span></div><div><span></span></div></div></div><div><div><div><span></span></div><div><span></span></div><div><span></span></div><div><span></span></div><div><span></span></div><div><span></span></div></div></div><div><div><div><span></span></div><div><span></span></div><div><span></span></div><div><span></span></div><div><span></span></div><div><span></span></div></div></div><div><div><div><span></span></div><div><span></span></div><div><span></span></div><div><span></span></div><div><span></span></div><div><span></span></div></div></div></div></div><div><div><div><div><div><div><span></span></div><div><span></span></div><div><span></span></div><div><span></span></div><div><span></span></div><div><span></span></div></div></div><div><div><div><span></span></div><div><span></span></div><div><span></span></div><div><span></span></div><div><span></span></div><div><span></span></div></div></div><div><div><div><span></span></div><div><span></span></div><div><span></span></div><div><span></span></div><div><span></span></div><div><span></span></div></div></div><div><div><div><span></span></div><div><span></span></div><div><span></span></div><div><span></span></div><div><span></span></div><div><span></span></div></div></div><div><div><div><span></span></div><div><span></span></div><div><span></span></div><div><span></span></div><div><span></span></div><div><span></span></div></div></div></div></div><div><div><div><div><div><div><span></span></div><div><span></span></div><div><span></span></div><div><span></span></div><div><span></span></div><div><span></span></div></div></div><div><div><div><span></span></div><div><span></span></div><div><span></span></div><div><span></span></div><div><span></span></div><div><span></span></div></div></div><div><div><div><span></span></div><div><span></span></div><div><span></span></div><div><span></span></div><div><span></span></div><div><span></span></div></div></div><div><div><div><span></span></div><div><span></span></div><div><span></span></div><div><span></span></div><div><span></span></div><div><span></span></div></div></div><div><div><div><span></span></div><div><span></span></div><div><span></span></div><div><span></span></div><div><span></span></div><div><span></span></div></div></div></div></div><div><div><div><div><div><div><span></span></div><div><span></span></div><div><span></span></div><div><span></span></div><div><span></span></div><div><span></span></div></div></div><div><div><div><span></span></div><div><span></span></div><div><span></span></div><div><span></span></div><div><span></span></div><div><span></span></div></div></div><div><div><div><span></span></div><div><span></span></div><div><span></span></div><div><span></span></div><div><span></span></div><div><span></span></div></div></div><div><div><div><span></span></div><div><span></span></div><div><span></span></div><div><span></span></div><div><span></span></div><div><span></span></div></div></div><div><div><div><span></span></div><div><span></span></div><div><span></span></div><div><span></span></div><div><span></span></div><div><span></span></div></div></div></div></div><div><div><div><div><div><div><span></span></div><div><span></span></div><div><span></span></div><div><span></span></div><div><span></span></div><div><span></span></div></div></div><div><div><div><span></span></div><div><span></span></div><div><span></span></div><div><span></span></div><div><span></span></div><div><span></span></div></div></div><div><div><div><span></span></div><div><span></span></div><div><span></span></div><div><span></span></div><div><span></span></div><div><span></span></div></div></div><div><div><div><span></span></div><div><span></span></div><div><span></span></div><div><span></span></div><div><span></span></div><div><span></span></div></div></div><div><div><div><span></span></div><div><span></span></div><div><span></span></div><div><span></span></div><div><span></span></div><div><span></span></div></div></div></div></div><div><div><div><div><div><div><span></span></div><div><span></span></div><div><span></span></div><div><span></span></div><div><span></span></div><div><span></span></div></div></div><div><div><div><span></span></div><div><span></span></div><div><span></span></div><div><span></span></div><div><span></span></div><div><span></span></div></div></div><div><div><div><span></span></div><div><span></span></div><div><span></span></div><div><span></span></div><div><span></span></div><div><span></span></div></div></div><div><div><div><span></span></div><div><span></span></div><div><span></span></div><div><span></span></div><div><span></span></div><div><span></span></div></div></div><div><div><div><span></span></div><div><span></span></div><div><span></span></div><div><span></span></div><div><span></span></div><div><span></span></div></div></div></div></div><div><div><div><div><div><div><span></span></div><div><span></span></div><div><span></span></div><div><span></span></div><div><span></span></div><div><span></span></div></div></div><div><div><div><span></span></div><div><span></span></div><div><span></span></div><div><span></span></div><div><span></span></div><div><span></span></div></div></div><div><div><div><span></span></div><div><span></span></div><div><span></span></div><div><span></span></div><div><span></span></div><div><span></span></div></div></div><div><div><div><span></span></div><div><span></span></div><div><span></span></div><div><span></span></div><div><span></span></div><div><span></span></div></div></div><div><div><div><span></span></div><div><span></span></div><div><span></span></div><div><span></span></div><div><span></span></div><div><span></span></div></div></div></div></div><div><div><div><div><div><div><span></span></div><div><span></span></div><div><span></span></div><div><span></span></div><div><span></span></div><div><span></span></div></div></div><div><div><div><span></span></div><div><span></span></div><div><span></span></div><div><span></span></div><div><span></span></div><div><span></span></div></div></div><div><div><div><span></span></div><div><span></span></div><div><span></span></div><div><span></span></div><div><span></span></div><div><span></span></div></div></div><div><div><div><span></span></div><div><span></span></div><div><span></span></div><div><span></span></div><div><span></span></div><div><span></span></div></div></div><div><div><div><span></span></div><div><span></span></div><div><span></span></div><div><span></span></div><div><span></span></div><div><span></span></div></div></div></div></div><div><div><div><div><div><div><span></span></div><div><span></span></div><div><span></span></div><div><span></span></div><div><span></span></div><div><span></span></div></div></div><div><div><div><span></span></div><div><span></span></div><div><span></span></div><div><span></span></div><div><span></span></div><div><span></span></div></div></div><div><div><div><span></span></div><div><span></span></div><div><span></span></div><div><span></span></div><div><span></span></div><div><span></span></div></div></div><div><div><div><span></span></div><div><span></span></div><div><span></span></div><div><span></span></div><div><span></span></div><div><span></span></div></div></div><div><div><div><span></span></div><div><span></span></div><div><span></span></div><div><span></span></div><div><span></span></div><div><span></span></div></div></div></div></div><div><div><div><div><div><div><span></span></div><div><span></span></div><div><span></span></div><div><span></span></div><div><span></span></div><div><span></span></div></div></div><div><div><div><span></span></div><div><span></span></div><div><span></span></div><div><span></span></div><div><span></span></div><div><span></span></div></div></div><div><div><div><span></span></div><div><span></span></div><div><span></span></div><div><span></span></div><div><span></span></div><div><span></span></div></div></div><div><div><div><span></span></div><div><span></span></div><div><span></span></div><div><span></span></div><div><span></span></div><div><span></span></div></div></div><div><div><div><span></span></div><div><span></span></div><div><span></span></div><div><span></span></div><div><span></span></div><div><span></span></div></div></div></div></div><div><div><div><div><div><div><span></span></div><div><span></span></div><div><span></span></div><div><span></span></div><div><span></span></div><div><span></span></div></div></div><div><div><div><span></span></div><div><span></span></div><div><span></span></div><div><span></span></div><div><span></span></div><div><span></span></div></div></div><div><div><div><span></span></div><div><span></span></div><div><span></span></div><div><span></span></div><div><span></span></div><div><span></span></div></div></div><div><div><div><span></span></div><div><span></span></div><div><span></span></div><div><span></span></div><div><span></span></div><div><span></span></div></div></div><div><div><div><span></span></div><div><span></span></div><div><span></span></div><div><span></span></div><div><span></span></div><div><span></span></div></div></div></div></div><div><div><div><div><div><div><span></span></div><div><span></span></div><div><span></span></div><div><span></span></div><div><span></span></div><div><span></span></div></div></div><div><div><div><span></span></div><div><span></span></div><div><span></span></div><div><span></span></div><div><span></span></div><div><span></span></div></div></div><div><div><div><span></span></div><div><span></span></div><div><span></span></div><div><span></span></div><div><span></span></div><div><span></span></div></div></div><div><div><div><span></span></div><div><span></span></div><div><span></span></div><div><span></span></div><div><span></span></div><div><span></span></div></div></div><div><div><div><span></span></div><div><span></span></div><div><span></span></div><div><span></span></div><div><span></span></div><div><span></span></div></div></div></div></div><div><div><div><div><div><div><span></span></div><div><span></span></div><div><span></span></div><div><span></span></div><div><span></span></div><div><span></span></div></div></div><div><div><div><span></span></div><div><span></span></div><div><span></span></div><div><span></span></div><div><span></span></div><div><span></span></div></div></div><div><div><div><span></span></div><div><span></span></div><div><span></span></div><div><span></span></div><div><span></span></div><div><span></span></div></div></div><div><div><div><span></span></div><div><span></span></div><div><span></span></div><div><span></span></div><div><span></span></div><div><span></span></div></div></div><div><div><div><span></span></div><div><span></span></div><div><span></span></div><div><span></span></div><div><span></span></div><div><span></span></div></div></div></div></div><div><div><div><div><div><div><span></span></div><div><span></span></div><div><span></span></div><div><span></span></div><div><span></span></div><div><span></span></div></div></div><div><div><div><span></span></div><div><span></span></div><div><span></span></div><div><span></span></div><div><span></span></div><div><span></span></div></div></div><div><div><div><span></span></div><div><span></span></div><div><span></span></div><div><span></span></div><div><span></span></div><div><span></span></div></div></div><div><div><div><span></span></div><div><span></span></div><div><span></span></div><div><span></span></div><div><span></span></div><div><span></span></div></div></div><div><div><div><span></span></div><div><span></span></div><div><span></span></div><div><span></span></div><div><span></span></div><div><span></span></div></div></div></div></div><div><div><div><div><div><div><span></span></div><div><span></span></div><div><span></span></div><div><span></span></div><div><span></span></div><div><span></span></div></div></div><div><div><div><span></span></div><div><span></span></div><div><span></span></div><div><span></span></div><div><span></span></div><div><span></span></div></div></div><div><div><div><span></span></div><div><span></span></div><div><span></span></div><div><span></span></div><div><span></span></div><div><span></span></div></div></div><div><div><div><span></span></div><div><span></span></div><div><span></span></div><div><span></span></div><div><span></span></div><div><span></span></div></div></div><div><div><div><span></span></div><div><span></span></div><div><span></span></div><div><span></span></div><div><span></span></div><div><span></span></div></div></div></div></div><div><div><div><div><div><div><span></span></div><div><span></span></div><div><span></span></div><div><span></span></div><div><span></span></div><div><span></span></div></div></div><div><div><div><span></span></div><div><span></span></div><div><span></span></div><div><span></span></div><div><span></span></div><div><span></span></div></div></div><div><div><div><span></span></div><div><span></span></div><div><span></span></div><div><span></span></div><div><span></span></div><div><span></span></div></div></div><div><div><div><span></span></div><div><span></span></div><div><span></span></div><div><span></span></div><div><span></span></div><div><span></span></div></div></div><div><div><div><span></span></div><div><span></span></div><div><span></span></div><div><span></span></div><div><span></span></div><div><span></span></div></div></div></div></div><div><div><div><div><div><div><span></span></div><div><span></span></div><div><span></span></div><div><span></span></div><div><span></span></div><div><span></span></div></div></div><div><div><div><span></span></div><div><span></span></div><div><span></span></div><div><span></span></div><div><span></span></div><div><span></span></div></div></div><div><div><div><span></span></div><div><span></span></div><div><span></span></div><div><span></span></div><div><span></span></div><div><span></span></div></div></div><div><div><div><span></span></div><div><span></span></div><div><span></span></div><div><span></span></div><div><span></span></div><div><span></span></div></div></div><div><div><div><span></span></div><div><span></span></div><div><span></span></div><div><span></span></div><div><span></span></div><div><span></span></div></div></div></div></div><div><div><div><div><div><div><span></span></div><div><span></span></div><div><span></span></div><div><span></span></div><div><span></span></div><div><span></span></div></div></div><div><div><div><span></span></div><div><span></span></div><div><span></span></div><div><span></span></div><div><span></span></div><div><span></span></div></div></div><div><div><div><span></span></div><div><span></span></div><div><span></span></div><div><span></span></div><div><span></span></div><div><span></span></div></div></div><div><div><div><span></span></div><div><span></span></div><div><span></span></div><div><span></span></div><div><span></span></div><div><span></span></div></div></div><div><div><div><span></span></div><div><span></span></div><div><span></span></div><div><span></span></div><div><span></span></div><div><span></span></div></div></div></div></div><div><div><div><div><div><div><span></span></div><div><span></span></div><div><span></span></div><div><span></span></div><div><span></span></div><div><span></span></div></div></div><div><div><div><span></span></div><div><span></span></div><div><span></span></div><div><span></span></div><div><span></span></div><div><span></span></div></div></div><div><div><div><span></span></div><div><span></span></div><div><span></span></div><div><span></span></div><div><span></span></div><div><span></span></div></div></div><div><div><div><span></span></div><div><span></span></div><div><span></span></div><div><span></span></div><div><span></span></div><div><span></span></div></div></div><div><div><div><span></span></div><div><span></span></div><div><span></span></div><div><span></span></div><div><span></span></div><div><span></span></div></div></div></div></div><div><div><div><div><div><div><span></span></div><div><span></span></div><div><span></span></div><div><span></span></div><div><span></span></div><div><span></span></div></div></div><div><div><div><span></span></div><div><span></span></div><div><span></span></div><div><span></span></div><div><span></span></div><div><span></span></div></div></div><div><div><div><span></span></div><div><span></span></div><div><span></span></div><div><span></span></div><div><span></span></div><div><span></span></div></div></div><div><div><div><span></span></div><div><span></span></div><div><span></span></div><div><span></span></div><div><span></span></div><div><span></span></div></div></div><div><div><div><span></span></div><div><span></span></div><div><span></span></div><div><span></span></div><div><span></span></div><div><span></span></div></div></div></div></div><div><div><div><div><div><div><span></span></div><div><span></span></div><div><span></span></div><div><span></span></div><div><span></span></div><div><span></span></div></div></div><div><div><div><span></span></div><div><span></span></div><div><span></span></div><div><span></span></div><div><span></span></div><div><span></span></div></div></div><div><div><div><span></span></div><div><span></span></div><div><span></span></div><div><span></span></div><div><span></span></div><div><span></span></div></div></div><div><div><div><span></span></div><div><span></span></div><div><span></span></div><div><span></span></div><div><span></span></div><div><span></span></div></div></div><div><div><div><span></span></div><div><span></span></div><div><span></span></div><div><span></span></div><div><span></span></div><div><span></span></div></div></div></div></div><div><div><div><div><div><div><span></span></div><div><span></span></div><div><span></span></div><div><span></span></div><div><span></span></div><div><span></span></div></div></div><div><div><div><span></span></div><div><span></span></div><div><span></span></div><div><span></span></div><div><span></span></div><div><span></span></div></div></div><div><div><div><span></span></div><div><span></span></div><div><span></span></div><div><span></span></div><div><span></span></div><div><span></span></div></div></div><div><div><div><span></span></div><div><span></span></div><div><span></span></div><div><span></span></div><div><span></span></div><div><span></span></div></div></div><div><div><div><span></span></div><div><span></span></div><div><span></span></div><div><span></span></div><div><span></span></div><div><span></span></div></div></div></div></div><div><div><div><div><div><div><span></span></div><div><span></span></div><div><span></span></div><div><span></span></div><div><span></span></div><div><span></span></div></div></div><div><div><div><span></span></div><div><span></span></div><div><span></span></div><div><span></span></div><div><span></span></div><div><span></span></div></div></div><div><div><div><span></span></div><div><span></span></div><div><span></span></div><div><span></span></div><div><span></span></div><div><span></span></div></div></div><div><div><div><span></span></div><div><span></span></div><div><span></span></div><div><span></span></div><div><span></span></div><div><span></span></div></div></div><div><div><div><span></span></div><div><span></span></div><div><span></span></div><div><span></span></div><div><span></span></div><div><span></span></div></div></div></div></div><div><div><div><div><div><div><span></span></div><div><span></span></div><div><span></span></div><div><span></span></div><div><span></span></div><div><span></span></div></div></div><div><div><div><span></span></div><div><span></span></div><div><span></span></div><div><span></span></div><div><span></span></div><div><span></span></div></div></div><div><div><div><span></span></div><div><span></span></div><div><span></span></div><div><span></span></div><div><span></span></div><div><span></span></div></div></div><div><div><div><span></span></div><div><span></span></div><div><span></span></div><div><span></span></div><div><span></span></div><div><span></span></div></div></div><div><div><div><span></span></div><div><span></span></div><div><span></span></div><div><span></span></div><div><span></span></div><div><span></span></div></div></div></div></div><div><div><div><div><div><div><span></span></div><div><span></span></div><div><span></span></div><div><span></span></div><div><span></span></div><div><span></span></div></div></div><div><div><div><span></span></div><div><span></span></div><div><span></span></div><div><span></span></div><div><span></span></div><div><span></span></div></div></div><div><div><div><span></span></div><div><span></span></div><div><span></span></div><div><span></span></div><div><span></span></div><div><span></span></div></div></div><div><div><div><span></span></div><div><span></span></div><div><span></span></div><div><span></span></div><div><span></span></div><div><span></span></div></div></div><div><div><div><span></span></div><div><span></span></div><div><span></span></div><div><span></span></div><div><span></span></div><div><span></span></div></div></div></div></div><div><div><div><div><div><div><span></span></div><div><span></span></div><div><span></span></div><div><span></span></div><div><span></span></div><div><span></span></div></div></div><div><div><div><span></span></div><div><span></span></div><div><span></span></div><div><span></span></div><div><span></span></div><div><span></span></div></div></div><div><div><div><span></span></div><div><span></span></div><div><span></span></div><div><span></span></div><div><span></span></div><div><span></span></div></div></div><div><div><div><span></span></div><div><span></span></div><div><span></span></div><div><span></span></div><div><span></span></div><div><span></span></div></div></div><div><div><div><span></span></div><div><span></span></div><div><span></span></div><div><span></span></div><div><span></span></div><div><span></span></div></div></div></div></div><div><div><div><div><div><div><span></span></div><div><span></span></div><div><span></span></div><div><span></span></div><div><span></span></div><div><span></span></div></div></div><div><div><div><span></span></div><div><span></span></div><div><span></span></div><div><span></span></div><div><span></span></div><div><span></span></div></div></div><div><div><div><span></span></div><div><span></span></div><div><span></span></div><div><span></span></div><div><span></span></div><div><span></span></div></div></div><div><div><div><span></span></div><div><span></span></div><div><span></span></div><div><span></span></div><div><span></span></div><div><span></span></div></div></div><div><div><div><span></span></div><div><span></span></div><div><span></span></div><div><span></span></div><div><span></span></div><div><span></span></div></div></div></div></div><div><div><div><div><div><div><span></span></div><div><span></span></div><div><span></span></div><div><span></span></div><div><span></span></div><div><span></span></div></div></div><div><div><div><span></span></div><div><span></span></div><div><span></span></div><div><span></span></div><div><span></span></div><div><span></span></div></div></div><div><div><div><span></span></div><div><span></span></div><div><span></span></div><div><span></span></div><div><span></span></div><div><span></span></div></div></div><div><div><div><span></span></div><div><span></span></div><div><span></span></div><div><span></span></div><div><span></span></div><div><span></span></div></div></div><div><div><div><span></span></div><div><span></span></div><div><span></span></div><div><span></span></div><div><span></span></div><div><span></span></div></div></div></div></div><div><div><div><div><div><div><span></span></div><div><span></span></div><div><span></span></div><div><span></span></div><div><span></span></div><div><span></span></div></div></div><div><div><div><span></span></div><div><span></span></div><div><span></span></div><div><span></span></div><div><span></span></div><div><span></span></div></div></div><div><div><div><span></span></div><div><span></span></div><div><span></span></div><div><span></span></div><div><span></span></div><div><span></span></div></div></div><div><div><div><span></span></div><div><span></span></div><div><span></span></div><div><span></span></div><div><span></span></div><div><span></span></div></div></div><div><div><div><span></span></div><div><span></span></div><div><span></span></div><div><span></span></div><div><span></span></div><div><span></span></div></div></div></div></div><div><div><div><div><div><div><span></span></div><div><span></span></div><div><span></span></div><div><span></span></div><div><span></span></div><div><span></span></div></div></div><div><div><div><span></span></div><div><span></span></div><div><span></span></div><div><span></span></div><div><span></span></div><div><span></span></div></div></div><div><div><div><span></span></div><div><span></span></div><div><span></span></div><div><span></span></div><div><span></span></div><div><span></span></div></div></div><div><div><div><span></span></div><div><span></span></div><div><span></span></div><div><span></span></div><div><span></span></div><div><span></span></div></div></div><div><div><div><span></span></div><div><span></span></div><div><span></span></div><div><span></span></div><div><span></span></div><div><span></span></div></div></div></div></div><div><div><div><div><div><div><span></span></div><div><span></span></div><div><span></span></div><div><span></span></div><div><span></span></div><div><span></span></div></div></div><div><div><div><span></span></div><div><span></span></div><div><span></span></div><div><span></span></div><div><span></span></div><div><span></span></div></div></div><div><div><div><span></span></div><div><span></span></div><div><span></span></div><div><span></span></div><div><span></span></div><div><span></span></div></div></div><div><div><div><span></span></div><div><span></span></div><div><span></span></div><div><span></span></div><div><span></span></div><div><span></span></div></div></div><div><div><div><span></span></div><div><span></span></div><div><span></span></div><div><span></span></div><div><span></span></div><div><span></span></div></div></div></div></div><div><div><div><div><div><div><span></span></div><div><span></span></div><div><span></span></div><div><span></span></div><div><span></span></div><div><span></span></div></div></div><div><div><div><span></span></div><div><span></span></div><div><span></span></div><div><span></span></div><div><span></span></div><div><span></span></div></div></div><div><div><div><span></span></div><div><span></span></div><div><span></span></div><div><span></span></div><div><span></span></div><div><span></span></div></div></div><div><div><div><span></span></div><div><span></span></div><div><span></span></div><div><span></span></div><div><span></span></div><div><span></span></div></div></div><div><div><div><span></span></div><div><span></span></div><div><span></span></div><div><span></span></div><div><span></span></div><div><span></span></div></div></div></div></div><div><div><div><div><div><div><span></span></div><div><span></span></div><div><span></span></div><div><span></span></div><div><span></span></div><div><span></span></div></div></div><div><div><div><span></span></div><div><span></span></div><div><span></span></div><div><span></span></div><div><span></span></div><div><span></span></div></div></div><div><div><div><span></span></div><div><span></span></div><div><span></span></div><div><span></span></div><div><span></span></div><div><span></span></div></div></div><div><div><div><span></span></div><div><span></span></div><div><span></span></div><div><span></span></div><div><span></span></div><div><span></span></div></div></div><div><div><div><span></span></div><div><span></span></div><div><span></span></div><div><span></span></div><div><span></span></div><div><span></span></div></div></div></div></div><div><div><div><div><div><div><span></span></div><div><span></span></div><div><span></span></div><div><span></span></div><div><span></span></div><div><span></span></div></div></div><div><div><div><span></span></div><div><span></span></div><div><span></span></div><div><span></span></div><div><span></span></div><div><span></span></div></div></div><div><div><div><span></span></div><div><span></span></div><div><span></span></div><div><span></span></div><div><span></span></div><div><span></span></div></div></div><div><div><div><span></span></div><div><span></span></div><div><span></span></div><div><span></span></div><div><span></span></div><div><span></span></div></div></div><div><div><div><span></span></div><div><span></span></div><div><span></span></div><div><span></span></div><div><span></span></div><div><span></span></div></div></div></div></div><div><div><div><div><div><div><span></span></div><div><span></span></div><div><span></span></div><div><span></span></div><div><span></span></div><div><span></span></div></div></div><div><div><div><span></span></div><div><span></span></div><div><span></span></div><div><span></span></div><div><span></span></div><div><span></span></div></div></div><div><div><div><span></span></div><div><span></span></div><div><span></span></div><div><span></span></div><div><span></span></div><div><span></span></div></div></div><div><div><div><span></span></div><div><span></span></div><div><span></span></div><div><span></span></div><div><span></span></div><div><span></span></div></div></div><div><div><div><span></span></div><div><span></span></div><div><span></span></div><div><span></span></div><div><span></span></div><div><span></span></div></div></div></div></div><div><div><div><div><div><div><span></span></div><div><span></span></div><div><span></span></div><div><span></span></div><div><span></span></div><div><span></span></div></div></div><div><div><div><span></span></div><div><span></span></div><div><span></span></div><div><span></span></div><div><span></span></div><div><span></span></div></div></div><div><div><div><span></span></div><div><span></span></div><div><span></span></div><div><span></span></div><div><span></span></div><div><span></span></div></div></div><div><div><div><span></span></div><div><span></span></div><div><span></span></div><div><span></span></div><div><span></span></div><div><span></span></div></div></div><div><div><div><span></span></div><div><span></span></div><div><span></span></div><div><span></span></div><div><span></span></div><div><span></span></div></div></div></div></div><div><div><div><div><div><div><span></span></div><div><span></span></div><div><span></span></div><div><span></span></div><div><span></span></div><div><span></span></div></div></div><div><div><div><span></span></div><div><span></span></div><div><span></span></div><div><span></span></div><div><span></span></div><div><span></span></div></div></div><div><div><div><span></span></div><div><span></span></div><div><span></span></div><div><span></span></div><div><span></span></div><div><span></span></div></div></div><div><div><div><span></span></div><div><span></span></div><div><span></span></div><div><span></span></div><div><span></span></div><div><span></span></div></div></div><div><div><div><span></span></div><div><span></span></div><div><span></span></div><div><span></span></div><div><span></span></div><div><span></span></div></div></div></div></div><div><div><div><div><div><div><span></span></div><div><span></span></div><div><span></span></div><div><span></span></div><div><span></span></div><div><span></span></div></div></div><div><div><div><span></span></div><div><span></span></div><div><span></span></div><div><span></span></div><div><span></span></div><div><span></span></div></div></div><div><div><div><span></span></div><div><span></span></div><div><span></span></div><div><span></span></div><div><span></span></div><div><span></span></div></div></div><div><div><div><span></span></div><div><span></span></div><div><span></span></div><div><span></span></div><div><span></span></div><div><span></span></div></div></div><div><div><div><span></span></div><div><span></span></div><div><span></span></div><div><span></span></div><div><span></span></div><div><span></span></div></div></div></div></div><div><div><div><div><div><div><span></span></div><div><span></span></div><div><span></span></div><div><span></span></div><div><span></span></div><div><span></span></div></div></div><div><div><div><span></span></div><div><span></span></div><div><span></span></div><div><span></span></div><div><span></span></div><div><span></span></div></div></div><div><div><div><span></span></div><div><span></span></div><div><span></span></div><div><span></span></div><div><span></span></div><div><span></span></div></div></div><div><div><div><span></span></div><div><span></span></div><div><span></span></div><div><span></span></div><div><span></span></div><div><span></span></div></div></div><div><div><div><span></span></div><div><span></span></div><div><span></span></div><div><span></span></div><div><span></span></div><div><span></span></div></div></div></div></div><div><div><div><div><div><div><span></span></div><div><span></span></div><div><span></span></div><div><span></span></div><div><span></span></div><div><span></span></div></div></div><div><div><div><span></span></div><div><span></span></div><div><span></span></div><div><span></span></div><div><span></span></div><div><span></span></div></div></div><div><div><div><span></span></div><div><span></span></div><div><span></span></div><div><span></span></div><div><span></span></div><div><span></span></div></div></div><div><div><div><span></span></div><div><span></span></div><div><span></span></div><div><span></span></div><div><span></span></div><div><span></span></div></div></div><div><div><div><span></span></div><div><span></span></div><div><span></span></div><div><span></span></div><div><span></span></div><div><span></span></div></div></div></div></div><div><div><div><div><div><div><span></span></div><div><span></span></div><div><span></span></div><div><span></span></div><div><span></span></div><div><span></span></div></div></div><div><div><div><span></span></div><div><span></span></div><div><span></span></div><div><span></span></div><div><span></span></div><div><span></span></div></div></div><div><div><div><span></span></div><div><span></span></div><div><span></span></div><div><span></span></div><div><span></span></div><div><span></span></div></div></div><div><div><div><span></span></div><div><span></span></div><div><span></span></div><div><span></span></div><div><span></span></div><div><span></span></div></div></div><div><div><div><span></span></div><div><span></span></div><div><span></span></div><div><span></span></div><div><span></span></div><div><span></span></div></div></div></div></div><div><div><div><div><div><div><span></span></div><div><span></span></div><div><span></span></div><div><span></span></div><div><span></span></div><div><span></span></div></div></div><div><div><div><span></span></div><div><span></span></div><div><span></span></div><div><span></span></div><div><span></span></div><div><span></span></div></div></div><div><div><div><span></span></div><div><span></span></div><div><span></span></div><div><span></span></div><div><span></span></div><div><span></span></div></div></div><div><div><div><span></span></div><div><span></span></div><div><span></span></div><div><span></span></div><div><span></span></div><div><span></span></div></div></div><div><div><div><span></span></div><div><span></span></div><div><span></span></div><div><span></span></div><div><span></span></div><div><span></span></div></div></div></div></div><div><div><div><div><div><div><span></span></div><div><span></span></div><div><span></span></div><div><span></span></div><div><span></span></div><div><span></span></div></div></div><div><div><div><span></span></div></div></div></div></div></div></div></div></div></div></div></div></div></div></div></div></div></div></div></div></div></div></div></div></div></div></div></div></div></div></div></div></div></div></div></div></div></div></div></div></div></div></div></div></div></div></div></div> |                              |  |  |  |  |

|                                                                                                                                                                                                                                                                                                                                                                                                                                                                                                                                                                                                                                                                                                                                                                                                                                                                                                                                                                                                                                                                                                                                                                                                                                                                                                                                                                                                                                                                                                                                                                                                                                                                                                                                                                                                                                                                                                                                                                                                                                                                                                                                                                                                                                                                                                                                                                                                                                                                                                                                                                                                                                                                                                                                                                                                                                                                                                                                                                                                                                                                                                                                                                                                                                                                                                                                                                                                                                                                                                                                                                                                                                                                                                                                                                                                                                                                                                                                                                                                                                                                                                                                                                                                                                                                                                                                                                                                                                                                                                                                                                                                                                                                                                                                                                                                                                                                                                                                                                                                                                                                                                                                                                                                                                                                                                                                                                                                                                                                                                                                                                                                                                                                                                                                                                                                                                                                                                                                                                                                                                                                                                                                                                                                                                                                                                                                                                                                                                                                                                                                                                                                                                                                                                                                                                                                                                                                                                                                                                                                                                                                                                                                                                                                                                                                                                                                                                                                                                                                                                                                                                                                                                                                                                                                                                                                                                                                                                                                                                                                                                                                                                                                                                                                                                                                                                                                                                                                                                                                                                                                                                                                                                                                                                                                                                                                                                                                                                                                                                                                                                                                                                                                                                                                                                                                                                                                                                                                                                                                                                                                                                                                                                                                                                                                                                                                                                                                                                                                                                                                                                                                                                                                                                                                                                                                                                                                                                                                                                                                                                                                                                                                                                                                                                                                                                                                                                                                                                                                                                                                                                                                                                                                                                                                                                                                                                                                                                                                                                                                                                                                                                                                                                                                                                                                                                                                                                                                                                                                                                                                                                                                                                                                                                                                                                                                                                                                                                                                                                                                                                                                                                                                                                                                                                                                                                                                                                                                                                                                                                                                                                                                                                                                                                                                                                                                                                                                                                                                                                                                                                                                                                                                                                                                                                                                                                                                                                                                                                                                                                                                                                                                                                                                                                                                                                                                                                                                                                                                                                                                                                                                                                                                                                                                                                                             |                                      |  |  |  |  |
|-----------------------------------------------------------------------------------------------------------------------------------------------------------------------------------------------------------------------------------------------------------------------------------------------------------------------------------------------------------------------------------------------------------------------------------------------------------------------------------------------------------------------------------------------------------------------------------------------------------------------------------------------------------------------------------------------------------------------------------------------------------------------------------------------------------------------------------------------------------------------------------------------------------------------------------------------------------------------------------------------------------------------------------------------------------------------------------------------------------------------------------------------------------------------------------------------------------------------------------------------------------------------------------------------------------------------------------------------------------------------------------------------------------------------------------------------------------------------------------------------------------------------------------------------------------------------------------------------------------------------------------------------------------------------------------------------------------------------------------------------------------------------------------------------------------------------------------------------------------------------------------------------------------------------------------------------------------------------------------------------------------------------------------------------------------------------------------------------------------------------------------------------------------------------------------------------------------------------------------------------------------------------------------------------------------------------------------------------------------------------------------------------------------------------------------------------------------------------------------------------------------------------------------------------------------------------------------------------------------------------------------------------------------------------------------------------------------------------------------------------------------------------------------------------------------------------------------------------------------------------------------------------------------------------------------------------------------------------------------------------------------------------------------------------------------------------------------------------------------------------------------------------------------------------------------------------------------------------------------------------------------------------------------------------------------------------------------------------------------------------------------------------------------------------------------------------------------------------------------------------------------------------------------------------------------------------------------------------------------------------------------------------------------------------------------------------------------------------------------------------------------------------------------------------------------------------------------------------------------------------------------------------------------------------------------------------------------------------------------------------------------------------------------------------------------------------------------------------------------------------------------------------------------------------------------------------------------------------------------------------------------------------------------------------------------------------------------------------------------------------------------------------------------------------------------------------------------------------------------------------------------------------------------------------------------------------------------------------------------------------------------------------------------------------------------------------------------------------------------------------------------------------------------------------------------------------------------------------------------------------------------------------------------------------------------------------------------------------------------------------------------------------------------------------------------------------------------------------------------------------------------------------------------------------------------------------------------------------------------------------------------------------------------------------------------------------------------------------------------------------------------------------------------------------------------------------------------------------------------------------------------------------------------------------------------------------------------------------------------------------------------------------------------------------------------------------------------------------------------------------------------------------------------------------------------------------------------------------------------------------------------------------------------------------------------------------------------------------------------------------------------------------------------------------------------------------------------------------------------------------------------------------------------------------------------------------------------------------------------------------------------------------------------------------------------------------------------------------------------------------------------------------------------------------------------------------------------------------------------------------------------------------------------------------------------------------------------------------------------------------------------------------------------------------------------------------------------------------------------------------------------------------------------------------------------------------------------------------------------------------------------------------------------------------------------------------------------------------------------------------------------------------------------------------------------------------------------------------------------------------------------------------------------------------------------------------------------------------------------------------------------------------------------------------------------------------------------------------------------------------------------------------------------------------------------------------------------------------------------------------------------------------------------------------------------------------------------------------------------------------------------------------------------------------------------------------------------------------------------------------------------------------------------------------------------------------------------------------------------------------------------------------------------------------------------------------------------------------------------------------------------------------------------------------------------------------------------------------------------------------------------------------------------------------------------------------------------------------------------------------------------------------------------------------------------------------------------------------------------------------------------------------------------------------------------------------------------------------------------------------------------------------------------------------------------------------------------------------------------------------------------------------------------------------------------------------------------------------------------------------------------------------------------------------------------------------------------------------------------------------------------------------------------------------------------------------------------------------------------------------------------------------------------------------------------------------------------------------------------------------------------------------------------------------------------------------------------------------------------------------------------------------------------------------------------------------------------------------------------------------------------------------------------------------------------------------------------------------------------------------------------------------------------------------------------------------------------------------------------------------------------------------------------------------------------------------------------------------------------------------------------------------------------------------------------------------------------------------------------------------------------------------------------------------------------------------------------------------------------------------------------------------------------------------------------------------------------------------------------------------------------------------------------------------------------------------------------------------------------------------------------------------------------------------------------------------------------------------------------------------------------------------------------------------------------------------------------------------------------------------------------------------------------------------------------------------------------------------------------------------------------------------------------------------------------------------------------------------------------------------------------------------------------------------------------------------------------------------------------------------------------------------------------------------------------------------------------------------------------------------------------------------------------------------------------------------------------------------------------------------------------------------------------------------------------------------------------------------------------------------------------------------------------------------------------------------------------------------------------------------------------------------------------------------------------------------------------------------------------------------------------------------------------------------------------------------------------------------------------------------------------------------------------------------------------------------------------------------------------------------------------------------------------------------------------------------------------------------------------------------------------------------------------------------------------------------------------------------------------------------------------------------------------------------------------------------------------------------------------------------------------------------------------------------------------------------------------------------------------------------------------------------------------------------------------------------------------------------------------------------------------------------------------------------------------------------------------------------------------------------------------------------------------------------------------------------------------------------------------------------------------------------------------------------------------------------------------------------------------------------------------------------------------------------------------------------------------------------------------------------------------------------------------------------------------------------------------------------------------------------------------------------------------------------------------------------------------------------------------------------------------------------------------------------------------------------------------------------------------------------------------------------------------------------------------------------------------------------------------------------------------------------------------------------------------------------------------------------------------------------------------------------------------------------------------------------------------------------------------------------------------------------------------------------------------------------------------------------------------------------------------------------------------------------------------------------------------------------------------------------------------------------------------------------------------------------------------------------------------------------------------------------------------------------------------------------------------------------------------------------------------------------------------------------------------------------------------------------------------------------------------------------------------------------------------------------------------------------------------------------------------------------------------------------------------------------------------------------------------------------------------------------------------------------------------------------------------------------------------------------------------------------------------------------------------------------------------------------------|--------------------------------------|--|--|--|--|
| Chem. Name                                                                                                                                                                                                                                                                                                                                                                                                                                                                                                                                                                                                                                                                                                                                                                                                                                                                                                                                                                                                                                                                                                                                                                                                                                                                                                                                                                                                                                                                                                                                                                                                                                                                                                                                                                                                                                                                                                                                                                                                                                                                                                                                                                                                                                                                                                                                                                                                                                                                                                                                                                                                                                                                                                                                                                                                                                                                                                                                                                                                                                                                                                                                                                                                                                                                                                                                                                                                                                                                                                                                                                                                                                                                                                                                                                                                                                                                                                                                                                                                                                                                                                                                                                                                                                                                                                                                                                                                                                                                                                                                                                                                                                                                                                                                                                                                                                                                                                                                                                                                                                                                                                                                                                                                                                                                                                                                                                                                                                                                                                                                                                                                                                                                                                                                                                                                                                                                                                                                                                                                                                                                                                                                                                                                                                                                                                                                                                                                                                                                                                                                                                                                                                                                                                                                                                                                                                                                                                                                                                                                                                                                                                                                                                                                                                                                                                                                                                                                                                                                                                                                                                                                                                                                                                                                                                                                                                                                                                                                                                                                                                                                                                                                                                                                                                                                                                                                                                                                                                                                                                                                                                                                                                                                                                                                                                                                                                                                                                                                                                                                                                                                                                                                                                                                                                                                                                                                                                                                                                                                                                                                                                                                                                                                                                                                                                                                                                                                                                                                                                                                                                                                                                                                                                                                                                                                                                                                                                                                                                                                                                                                                                                                                                                                                                                                                                                                                                                                                                                                                                                                                                                                                                                                                                                                                                                                                                                                                                                                                                                                                                                                                                                                                                                                                                                                                                                                                                                                                                                                                                                                                                                                                                                                                                                                                                                                                                                                                                                                                                                                                                                                                                                                                                                                                                                                                                                                                                                                                                                                                                                                                                                                                                                                                                                                                                                                                                                                                                                                                                                                                                                                                                                                                                                                                                                                                                                                                                                                                                                                                                                                                                                                                                                                                                                                                                                                                                                                                                                                                                                                                                                                                                                                                                                                                                                  | Benzylamine (2f)                     |  |  |  |  |
| Lit. Ref.                                                                                                                                                                                                                                                                                                                                                                                                                                                                                                                                                                                                                                                                                                                                                                                                                                                                                                                                                                                                                                                                                                                                                                                                                                                                                                                                                                                                                                                                                                                                                                                                                                                                                                                                                                                                                                                                                                                                                                                                                                                                                                                                                                                                                                                                                                                                                                                                                                                                                                                                                                                                                                                                                                                                                                                                                                                                                                                                                                                                                                                                                                                                                                                                                                                                                                                                                                                                                                                                                                                                                                                                                                                                                                                                                                                                                                                                                                                                                                                                                                                                                                                                                                                                                                                                                                                                                                                                                                                                                                                                                                                                                                                                                                                                                                                                                                                                                                                                                                                                                                                                                                                                                                                                                                                                                                                                                                                                                                                                                                                                                                                                                                                                                                                                                                                                                                                                                                                                                                                                                                                                                                                                                                                                                                                                                                                                                                                                                                                                                                                                                                                                                                                                                                                                                                                                                                                                                                                                                                                                                                                                                                                                                                                                                                                                                                                                                                                                                                                                                                                                                                                                                                                                                                                                                                                                                                                                                                                                                                                                                                                                                                                                                                                                                                                                                                                                                                                                                                                                                                                                                                                                                                                                                                                                                                                                                                                                                                                                                                                                                                                                                                                                                                                                                                                                                                                                                                                                                                                                                                                                                                                                                                                                                                                                                                                                                                                                                                                                                                                                                                                                                                                                                                                                                                                                                                                                                                                                                                                                                                                                                                                                                                                                                                                                                                                                                                                                                                                                                                                                                                                                                                                                                                                                                                                                                                                                                                                                                                                                                                                                                                                                                                                                                                                                                                                                                                                                                                                                                                                                                                                                                                                                                                                                                                                                                                                                                                                                                                                                                                                                                                                                                                                                                                                                                                                                                                                                                                                                                                                                                                                                                                                                                                                                                                                                                                                                                                                                                                                                                                                                                                                                                                                                                                                                                                                                                                                                                                                                                                                                                                                                                                                                                                                                                                                                                                                                                                                                                                                                                                                                                                                                                                                                                                                   | ChemistrySelect, 2023, 8, e202204642 |  |  |  |  |
| <div><div><div><div><div><div><span></span></div><div><span></span></div></div></div><div><div><div><span></span></div><div><span></span></div></div></div><div><div><div><span></span></div><div><span></span></div></div></div></div><div><div><div><div><div><span></span></div><div><span></span></div></div></div><div><div><div><span></span></div><div><span></span></div></div></div><div><div><div><span></span></div><div><span></span></div></div></div></div></div><div><div><div><div><div><span></span></div><div><span></span></div></div></div><div><div><div><span></span></div><div><span></span></div></div></div><div><div><div><span></span></div><div><span></span></div></div></div></div></div><div><div><div><div><div><span></span></div><div><span></span></div></div></div><div><div><div><span></span></div><div><span></span></div></div></div><div><div><div><span></span></div><div><span></span></div></div></div></div></div><div><div><div><div><div><span></span></div><div><span></span></div></div></div><div><div><div><span></span></div><div><span></span></div></div></div><div><div><div><span></span></div><div><span></span></div></div></div></div></div><div><div><div><div><div><span></span></div><div><span></span></div></div></div><div><div><div><span></span></div><div><span></span></div></div></div><div><div><div><span></span></div><div><span></span></div></div></div></div></div><div><div><div><div><div><span></span></div><div><span></span></div></div></div><div><div><div><span></span></div><div><span></span></div></div></div><div><div><div><span></span></div><div><span></span></div></div></div></div></div><div><div><div><div><div><span></span></div><div><span></span></div></div></div><div><div><div><span></span></div><div><span></span></div></div></div><div><div><div><span></span></div><div><span></span></div></div></div></div></div><div><div><div><div><div><span></span></div><div><span></span></div></div></div><div><div><div><span></span></div><div><span></span></div></div></div><div><div><div><span></span></div><div><span></span></div></div></div></div></div><div><div><div><div><div><span></span></div><div><span></span></div></div></div><div><div><div><span></span></div><div><span></span></div></div></div><div><div><div><span></span></div><div><span></span></div></div></div></div></div><div><div><div><div><div><span></span></div><div><span></span></div></div></div><div><div><div><span></span></div><div><span></span></div></div></div><div><div><div><span></span></div><div><span></span></div></div></div></div></div><div><div><div><div><div><span></span></div><div><span></span></div></div></div><div><div><div><span></span></div><div><span></span></div></div></div><div><div><div><span></span></div><div><span></span></div></div></div></div></div><div><div><div><div><div><span></span></div><div><span></span></div></div></div><div><div><div><span></span></div><div><span></span></div></div></div><div><div><div><span></span></div><div><span></span></div></div></div></div></div><div><div><div><div><div><span></span></div><div><span></span></div></div></div><div><div><div><span></span></div><div><span></span></div></div></div><div><div><div><span></span></div><div><span></span></div></div></div></div></div><div><div><div><div><div><span></span></div><div><span></span></div></div></div><div><div><div><span></span></div><div><span></span></div></div></div><div><div><div><span></span></div><div><span></span></div></div></div></div></div><div><div><div><div><div><span></span></div><div><span></span></div></div></div><div><div><div><span></span></div><div><span></span></div></div></div><div><div><div><span></span></div><div><span></span></div></div></div></div></div><div><div><div><div><div><span></span></div><div><span></span></div></div></div><div><div><div><span></span></div><div><span></span></div></div></div><div><div><div><span></span></div><div><span></span></div></div></div></div></div><div><div><div><div><div><span></span></div><div><span></span></div></div></div><div><div><div><span></span></div><div><span></span></div></div></div><div><div><div><span></span></div><div><span></span></div></div></div></div></div><div><div><div><div><div><span></span></div><div><span></span></div></div></div><div><div><div><span></span></div><div><span></span></div></div></div><div><div><div><span></span></div><div><span></span></div></div></div></div></div><div><div><div><div><div><span></span></div><div><span></span></div></div></div><div><div><div><span></span></div><div><span></span></div></div></div><div><div><div><span></span></div><div><span></span></div></div></div></div></div><div><div><div><div><div><span></span></div><div><span></span></div></div></div><div><div><div><span></span></div><div><span></span></div></div></div><div><div><div><span></span></div><div><span></span></div></div></div></div></div><div><div><div><div><div><span></span></div><div><span></span></div></div></div><div><div><div><span></span></div><div><span></span></div></div></div><div><div><div><span></span></div><div><span></span></div></div></div></div></div><div><div><div><div><div><span></span></div><div><span></span></div></div></div><div><div><div><span></span></div><div><span></span></div></div></div><div><div><div><span></span></div><div><span></span></div></div></div></div></div><div><div><div><div><div><span></span></div><div><span></span></div></div></div><div><div><div><span></span></div><div><span></span></div></div></div><div><div><div><span></span></div><div><span></span></div></div></div></div></div><div><div><div><div><div><span></span></div><div><span></span></div></div></div><div><div><div><span></span></div><div><span></span></div></div></div><div><div><div><span></span></div><div><span></span></div></div></div></div></div><div><div><div><div><div><span></span></div><div><span></span></div></div></div><div><div><div><span></span></div><div><span></span></div></div></div><div><div><div><span></span></div><div><span></span></div></div></div></div></div><div><div><div><div><div><span></span></div><div><span></span></div></div></div><div><div><div><span></span></div><div><span></span></div></div></div><div><div><div><span></span></div><div><span></span></div></div></div></div></div><div><div><div><div><div><span></span></div><div><span></span></div></div></div><div><div><div><span></span></div><div><span></span></div></div></div><div><div><div><span></span></div><div><span></span></div></div></div></div></div><div><div><div><div><div><span></span></div><div><span></span></div></div></div><div><div><div><span></span></div><div><span></span></div></div></div><div><div><div><span></span></div><div><span></span></div></div></div></div></div><div><div><div><div><div><span></span></div><div><span></span></div></div></div><div><div><div><span></span></div><div><span></span></div></div></div><div><div><div><span></span></div><div><span></span></div></div></div></div></div><div><div><div><div><div><span></span></div><div><span></span></div></div></div><div><div><div><span></span></div><div><span></span></div></div></div><div><div><div><span></span></div><div><span></span></div></div></div></div></div><div><div><div><div><div><span></span></div><div><span></span></div></div></div><div><div><div><span></span></div><div><span></span></div></div></div><div><div><div><span></span></div><div><span></span></div></div></div></div></div><div><div><div><div><div><span></span></div><div><span></span></div></div></div><div><div><div><span></span></div><div><span></span></div></div></div><div><div><div><span></span></div><div><span></span></div></div></div></div></div><div><div><div><div><div><span></span></div><div><span></span></div></div></div><div><div><div><span></span></div><div><span></span></div></div></div><div><div><div><span></span></div><div><span></span></div></div></div></div></div><div><div><div><div><div><span></span></div><div><span></span></div></div></div><div><div><div><span></span></div><div><span></span></div></div></div><div><div><div><span></span></div><div><span></span></div></div></div></div></div><div><div><div><div><div><span></span></div><div><span></span></div></div></div><div><div><div><span></span></div><div><span></span></div></div></div><div><div><div><span></span></div><div><span></span></div></div></div></div></div><div><div><div><div><div><span></span></div><div><span></span></div></div></div><div><div><div><span></span></div><div><span></span></div></div></div><div><div><div><span></span></div><div><span></span></div></div></div></div></div><div><div><div><div><div><span></span></div><div><span></span></div></div></div><div><div><div><span></span></div><div><span></span></div></div></div><div><div><div><span></span></div><div><span></span></div></div></div></div></div><div><div><div><div><div><span></span></div><div><span></span></div></div></div><div><div><div><span></span></div><div><span></span></div></div></div><div><div><div><span></span></div><div><span></span></div></div></div></div></div><div><div><div><div><div><span></span></div><div><span></span></div></div></div><div><div><div><span></span></div><div><span></span></div></div></div><div><div><div><span></span></div><div><span></span></div></div></div></div></div><div><div><div><div><div><span></span></div><div><span></span></div></div></div><div><div><div><span></span></div><div><span></span></div></div></div><div><div><div><span></span></div><div><span></span></div></div></div></div></div><div><div><div><div><div><span></span></div><div><span></span></div></div></div><div><div><div><span></span></div><div><span></span></div></div></div><div><div><div><span></span></div><div><span></span></div></div></div></div></div><div><div><div><div><div><span></span></div><div><span></span></div></div></div><div><div><div><span></span></div><div><span></span></div></div></div><div><div><div><span></span></div><div><span></span></div></div></div></div></div><div><div><div><div><div><span></span></div><div><span></span></div></div></div><div><div><div><span></span></div><div><span></span></div></div></div><div><div><div><span></span></div><div><span></span></div></div></div></div></div><div><div><div><div><div><span></span></div><div><span></span></div></div></div><div><div><div><span></span></div><div><span></span></div></div></div><div><div><div><span></span></div><div><span></span></div></div></div></div></div><div><div><div><div><div><span></span></div><div><span></span></div></div></div><div><div><div><span></span></div><div><span></span></div></div></div><div><div><div><span></span></div><div><span></span></div></div></div></div></div><div><div><div><div><div><span></span></div><div><span></span></div></div></div><div><div><div><span></span></div><div><span></span></div></div></div><div><div><div><span></span></div><div><span></span></div></div></div></div></div><div><div><div><div><div><span></span></div><div><span></span></div></div></div><div><div><div><span></span></div><div><span></span></div></div></div><div><div><div><span></span></div><div><span></span></div></div></div></div></div><div><div><div><div><div><span></span></div><div><span></span></div></div></div><div><div><div><span></span></div><div><span></span></div></div></div><div><div><div><span></span></div><div><span></span></div></div></div></div></div><div><div><div><div><div><span></span></div><div><span></span></div></div></div><div><div><div><span></span></div><div><span></span></div></div></div><div><div><div><span></span></div><div><span></span></div></div></div></div></div><div><div><div><div><div><span></span></div><div><span></span></div></div></div><div><div><div><span></span></div><div><span></span></div></div></div><div><div><div><span></span></div><div><span></span></div></div></div></div></div><div><div><div><div><div><span></span></div><div><span></span></div></div></div><div><div><div><span></span></div><div><span></span></div></div></div><div><div><div><span></span></div><div><span></span></div></div></div></div></div><div><div><div><div><div><span></span></div><div><span></span></div></div></div><div><div><div><span></span></div><div><span></span></div></div></div><div><div><div><span></span></div><div><span></span></div></div></div></div></div><div><div><div><div><div><span></span></div><div><span></span></div></div></div><div><div><div><span></span></div><div><span></span></div></div></div><div><div><div><span></span></div><div><span></span></div></div></div></div></div><div><div><div><div><div><span></span></div><div><span></span></div></div></div><div><div><div><span></span></div><div><span></span></div></div></div><div><div><div><span></span></div><div><span></span></div></div></div></div></div><div><div><div><div><div><span></span></div><div><span></span></div></div></div><div><div><div><span></span></div><div><span></span></div></div></div><div><div><div><span></span></div><div><span></span></div></div></div></div></div><div><div><div><div><div><span></span></div><div><span></span></div></div></div><div><div><div><span></span></div><div><span></span></div></div></div><div><div><div><span></span></div><div><span></span></div></div></div></div></div><div><div><div><div><div><span></span></div><div><span></span></div></div></div><div><div><div><span></span></div><div><span></span></div></div></div><div><div><div><span></span></div><div><span></span></div></div></div></div></div><div><div><div><div><div><span></span></div><div><span></span></div></div></div><div><div><div><span></span></div><div><span></span></div></div></div><div><div><div><span></span></div><div><span></span></div></div></div></div></div><div><div><div><div><div><span></span></div><div><span></span></div></div></div><div><div><div><span></span></div><div><span></span></div></div></div><div><div><div><span></span></div><div><span></span></div></div></div></div></div><div><div><div><div><div><span></span></div><div><span></span></div></div></div><div><div><div><span></span></div><div><span></span></div></div></div><div><div><div><span></span></div></div></div></div></div></div></div> |                                      |  |  |  |  |





























|                                                                                                                                                                                                                                                                                                                                                                                                                                                                                                                                                                                                                                                                                                                                                                                                                               |                                             |                                              |       |            |            |
|-------------------------------------------------------------------------------------------------------------------------------------------------------------------------------------------------------------------------------------------------------------------------------------------------------------------------------------------------------------------------------------------------------------------------------------------------------------------------------------------------------------------------------------------------------------------------------------------------------------------------------------------------------------------------------------------------------------------------------------------------------------------------------------------------------------------------------|---------------------------------------------|----------------------------------------------|-------|------------|------------|
| Chem. Name                                                                                                                                                                                                                                                                                                                                                                                                                                                                                                                                                                                                                                                                                                                                                                                                                    | 5-Aminoindole (2s)                          |                                              |       |            |            |
|                                                                                                                                                                                                                                                                                                                                                                                                                                                                                                                                                                                                                                                                                                                                                                                                                               | Synthetic Communications, 2012, 42, 213–222 |                                              |       |            |            |
| <div><div><div><div><div>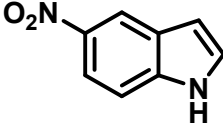</div><div>3i</div></div><div><div><math>\xrightarrow[\text{H}_2\text{O [0.5 M], 40}^\circ\text{C, 2h}]{\text{Ni(B)/PiNe (4 mol\%), NaBH}_4 \text{ (2.5 eq.)}}</math></div></div><div><div><div></div><div>2s</div></div></div></div></div></div>                                                                                                                                                                                                                                                                                                                                                                                 |                                             |                                              |       |            |            |
| <b>METHOD:</b> <p>In a 4 mL screw capped vial equipped with a magnetic stirrer, 5-Nitroindole (<b>3i</b>) (0.25 mmol, 40.5 mg), H<sub>2</sub>O (0.5 M, 0.5 mL), Ni(B)/PiNe (4 mol%, 11.5 mg) and NaBH<sub>4</sub> (2.5 eq., 23.6 mg) were consecutively added, and the resulting mixture was left under stirring at 40°C. After 2 h, the reaction mixture was left to cool to room temperature, diluted with 2-MeTHF (2 x 1 mL) and centrifuged (6500 rpm, 10', 5°C) to recover the reaction crude. Ni(B)/PiNe was subsequently washed with additional H<sub>2</sub>O (0.5 mL; 6500 rpm, 10', 5°C) and dried overnight under vacuum. The combined organic layers, once separated from the aqueous phase, were concentrated under reduced pressure to afford the title compound <b>2s</b> as a brown solid, 94% (31.1 mg).</p> |                                             |                                              |       |            |            |
| Mol Formula                                                                                                                                                                                                                                                                                                                                                                                                                                                                                                                                                                                                                                                                                                                                                                                                                   |                                             | C <sub>8</sub> H <sub>8</sub> N <sub>2</sub> |       | m.p.       | 131-135 °C |
| <sup>1</sup> H NMR<br>400 MHz<br>CDCl <sub>3</sub>                                                                                                                                                                                                                                                                                                                                                                                                                                                                                                                                                                                                                                                                                                                                                                            | δ value                                     | No. H                                        | Mult. | j value/Hz |            |
|                                                                                                                                                                                                                                                                                                                                                                                                                                                                                                                                                                                                                                                                                                                                                                                                                               | 7.97                                        | 1                                            | s     |            |            |
|                                                                                                                                                                                                                                                                                                                                                                                                                                                                                                                                                                                                                                                                                                                                                                                                                               | 7.12-7.20                                   | 2                                            | m     |            |            |
|                                                                                                                                                                                                                                                                                                                                                                                                                                                                                                                                                                                                                                                                                                                                                                                                                               | 6.96                                        | 1                                            | s     |            |            |
|                                                                                                                                                                                                                                                                                                                                                                                                                                                                                                                                                                                                                                                                                                                                                                                                                               | 6.67-6.69                                   | 1                                            | m     |            |            |
|                                                                                                                                                                                                                                                                                                                                                                                                                                                                                                                                                                                                                                                                                                                                                                                                                               | 6.38                                        | 1                                            | s     |            |            |
|                                                                                                                                                                                                                                                                                                                                                                                                                                                                                                                                                                                                                                                                                                                                                                                                                               | 3.51                                        | 2                                            | s     |            |            |
| <sup>13</sup> C NMR (100.6 MHz, CDCl <sub>3</sub> ) δ: 139.7, 130.8, 128.9, 124.8, 113.1, 111.6, 105.7, 101.7                                                                                                                                                                                                                                                                                                                                                                                                                                                                                                                                                                                                                                                                                                                 |                                             |                                              |       |            |            |
| GC-EIMS (m/z, %): 133 (44);132 (M+ 100); 131 (100); 105 (54); 104 (100); 78 (29); 77 (34); 66 (25); 52 (18); 51 (19);                                                                                                                                                                                                                                                                                                                                                                                                                                                                                                                                                                                                                                                                                                         |                                             |                                              |       |            |            |
